# Supplementary material
Source: PubMed Central journal article supplement (PMC8440125)
Supplement: NIHMS1734059-supplement-Supplementary_Data.pdf [file NIHMS1734059-supplement-Supplementary_Data.pdf]

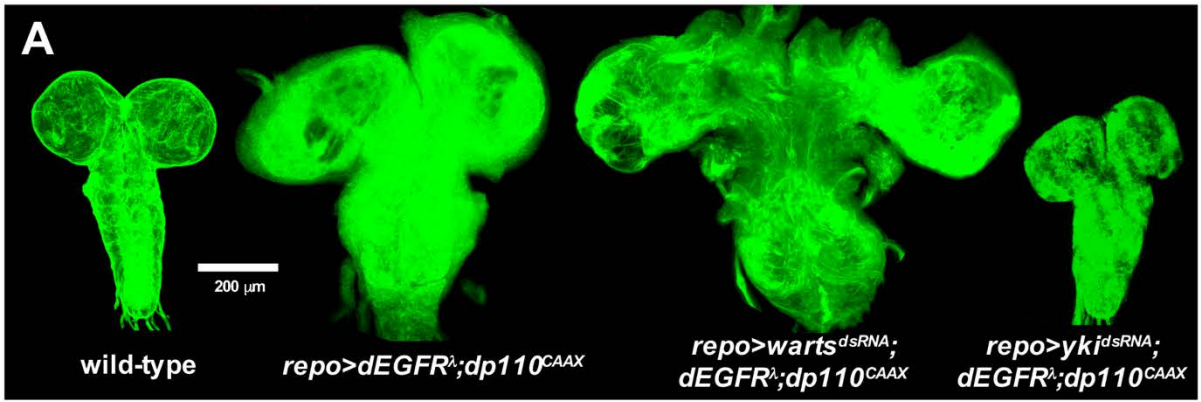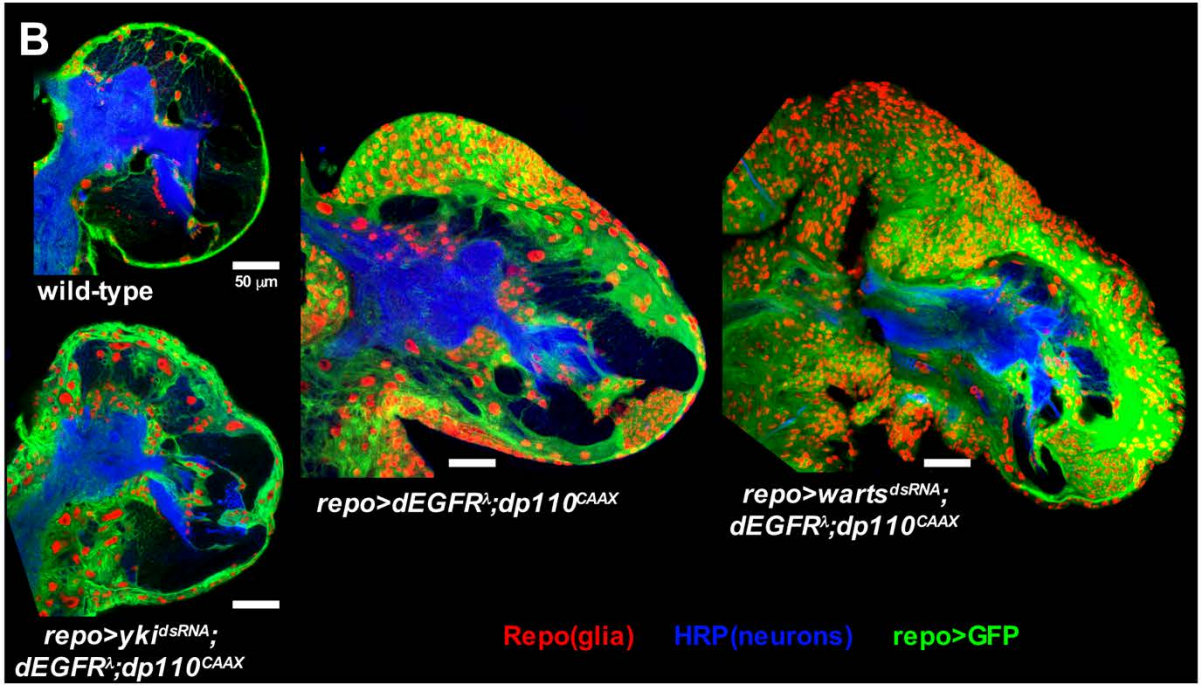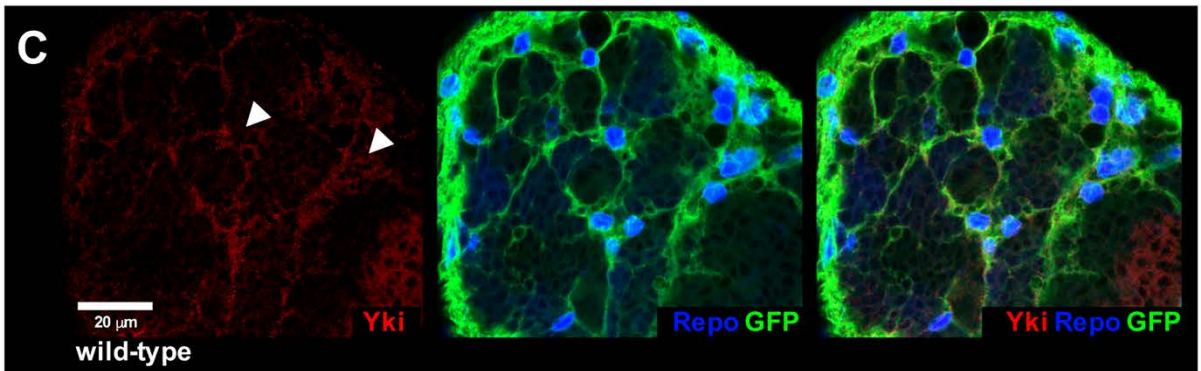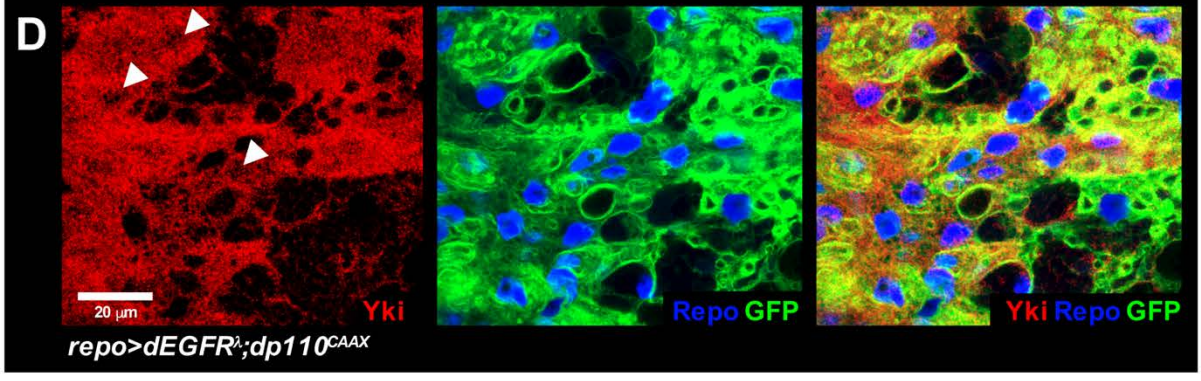

**Figure S1: Yki is required for EGFR-PI3K-driven glial neoplasia in *Drosophila***

**(A)** Optical projections of whole brain-nerve cord complexes from 3<sup>rd</sup> instar larvae approximately 130 hrs old. Dorsal view; anterior up. CD8-GFP (green) labels glial cell bodies. Compared to *repo>dEGFR<sup>Δ</sup>;dp110<sup>CAAX</sup>*, *warts* knockdown (*repo>warts<sup>dsRNA</sup>; dEGFR<sup>Δ</sup>;dp110<sup>CAAX</sup>*) increased neoplastic brain overgrowth and *yki* knockdown (*repo>yki<sup>dsRNA</sup>;dEGFR<sup>Δ</sup>;dp110<sup>CAAX</sup>*) decreased neoplastic brain overgrowth.

**(B)** 3 μm optical projections of brain hemispheres, age-matched 3<sup>rd</sup> instar larvae. Frontal sections; anterior up; midline to left. Repo (red) labels glial cell nuclei; CD8-GFP (green) labels glial cell bodies; anti-HRP (blue) counter-stains for neurons and neuropil. (middle) *repo>dEGFR<sup>Δ</sup>;dp110<sup>CAAX</sup>* showed increased glial cell numbers (red nuclei) compared to (upper left) wild-type. Compared to *repo>dEGFR<sup>Δ</sup>;dp110<sup>CAAX</sup>*, (right) *warts* knockdown increased neoplastic glial cell numbers (red nuclei), whereas (lower left) *yki* knockdown reduced neoplastic glial cell numbers (red nuclei).

**(C, D)** Low levels of Yki protein (red) was observed in wild-type central brain glia (white arrows, left panel in **C**) compared to high levels of cytoplasmic and nuclear Yki protein in *dEGFR<sup>Δ</sup>;dp110<sup>CAAX</sup>* neoplastic glia (white arrows, left panel in **D**); Repo (blue) labels glial cell nuclei; CD8-GFP (green) labels glial cell bodies.

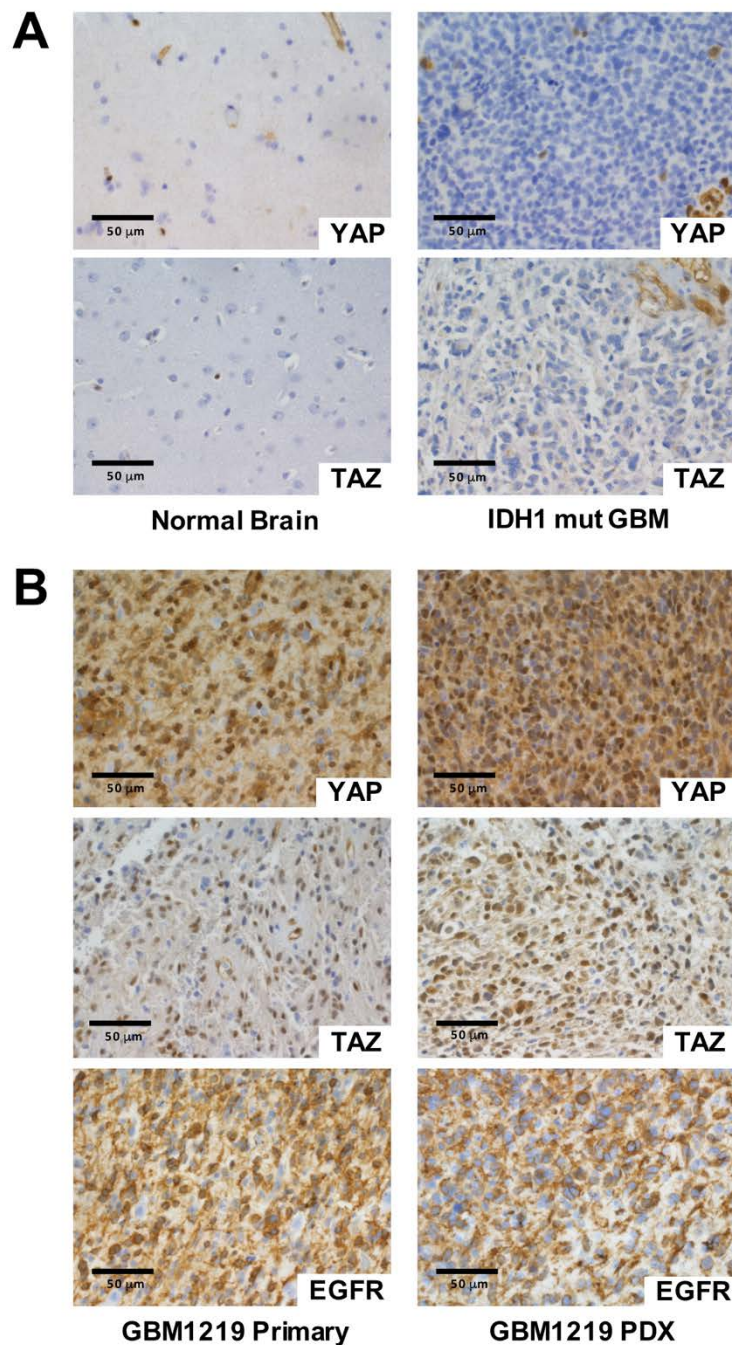

**Figure S2: YAP/TAZ expression confined to RTK-amplified tumor cells and maintained in patient-derived xenografts**

**(A)** On the left, immunohistochemical (IHC) staining in representative normal brain parenchyma in the cortex where YAP expression and TAZ expression was limited to vascular cells and was not detectable in normal neuronal and glial cells. On the right, IHC staining in a representative IDH1-mutant GBM specimen showed YAP and TAZ expression was detectable in vascular cells, but was present at low or undetectable levels in tumor cells.

**(B)** IHC for YAP, TAZ, and EGFR expression in tissue from an EGFR-amplified GBM tumor specimen and its matched patient-derived orthotopic xenograft. YAP and TAZ staining show cytoplasmic and nuclear localization (overlap with nuclear counterstain).

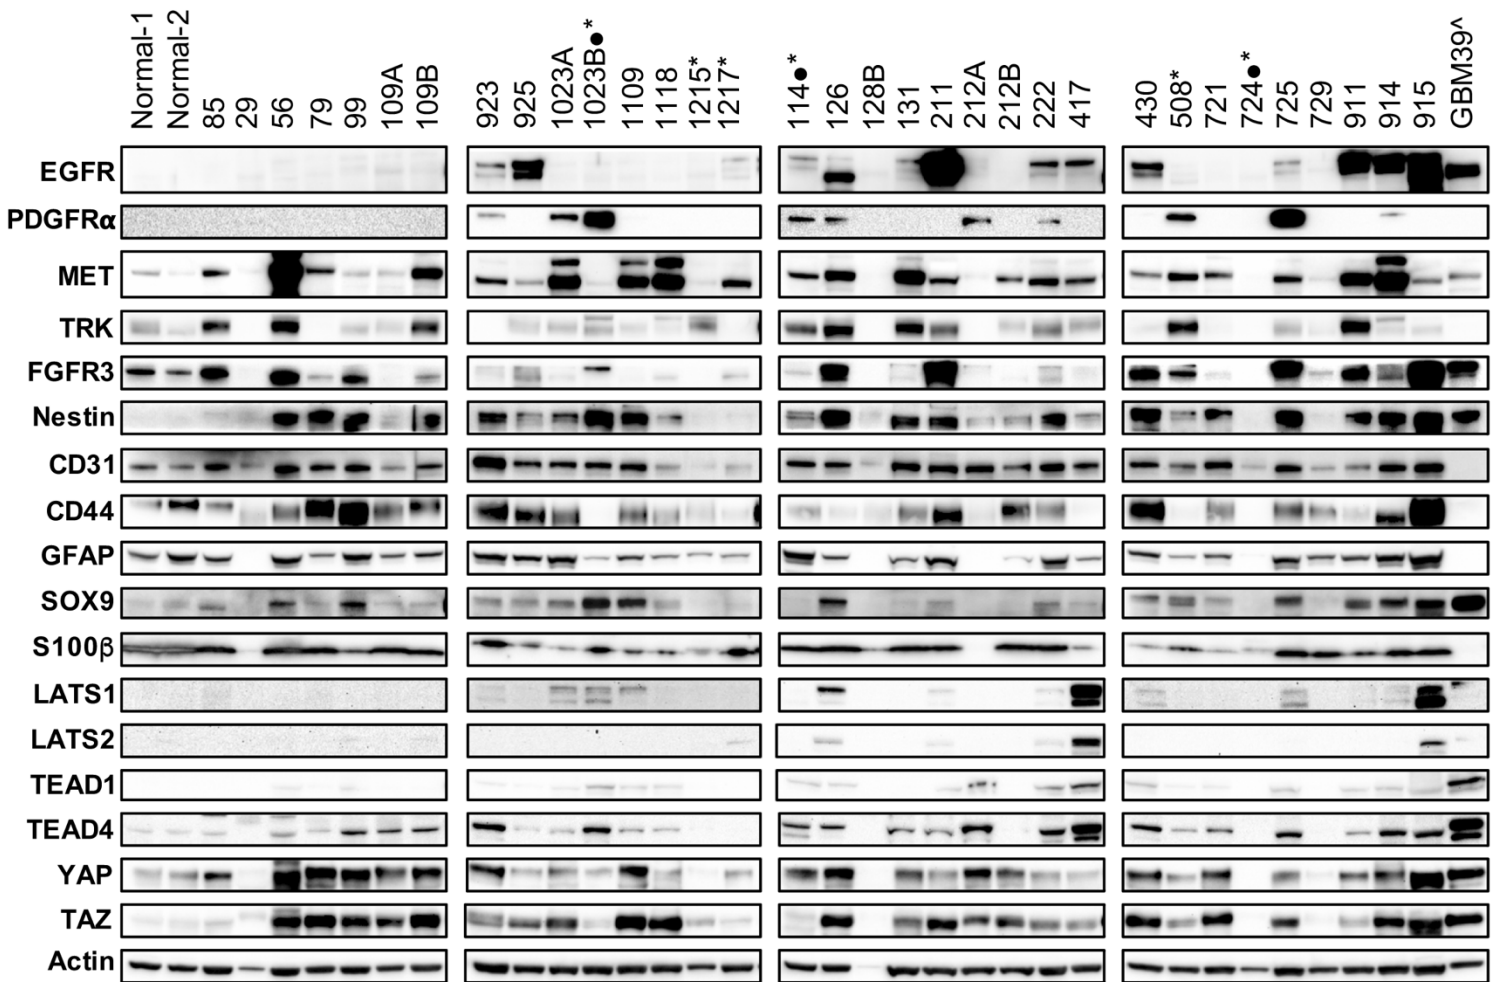

**Figure S3: YAP and TAZ are co-overexpressed in GBM**

Total tissue lysates from GBM surgical specimens immunoblotted for the indicated proteins. (●) indicates tumors with IDH1 mutations. (\*) indicates tumors with low YAP and TAZ expression by IHC. (▲) indicates GBM39 GSC neurosphere culture as a control for tumor-cell specific protein expression. High Nestin expression (stem cell marker) indicates specimens that contain mainly tumor. Lower migrating forms of EGFR (925, 126, 211, 430, and 915) are likely to be mutant variants such as EGFR<sup>viii</sup> (as in GBM39). The majority of GBM tumor specimens showed co-overexpression of YAP, TAZ, and TEAD4, and these tumors typically expressed markers that are predominantly associated with the classical (CL) subtype of adult GBM, such as EGFR, EGFR variants, other RTKs, such as FGFR3, and astrocytic markers GFAP, SOX9, and S100β. GBM tumor specimens that predominantly expressed indicators of the mesenchymal (MES) subtype (MET, CD44) also expressed TAZ, as previously published. GBM tumor specimens from IDH1 mutant (●) tumors showed low YAP and TAZ expression comparable with normal brain control tissue specimens.

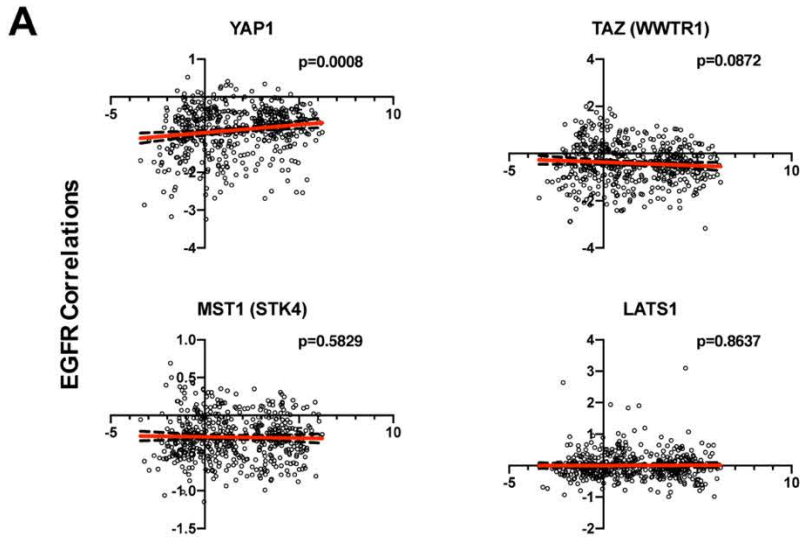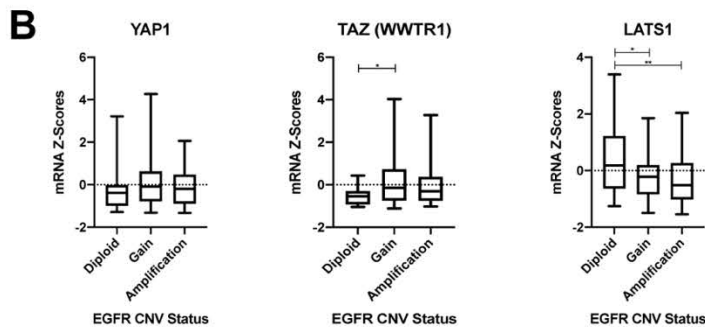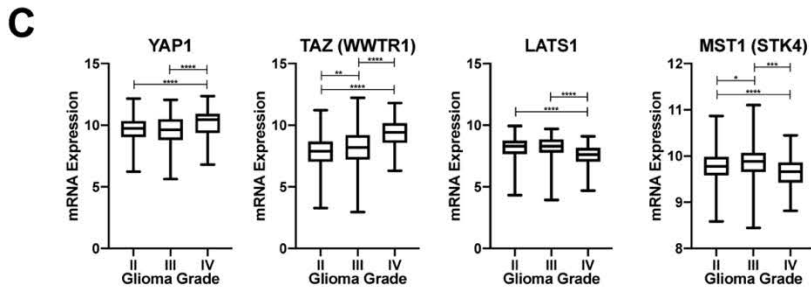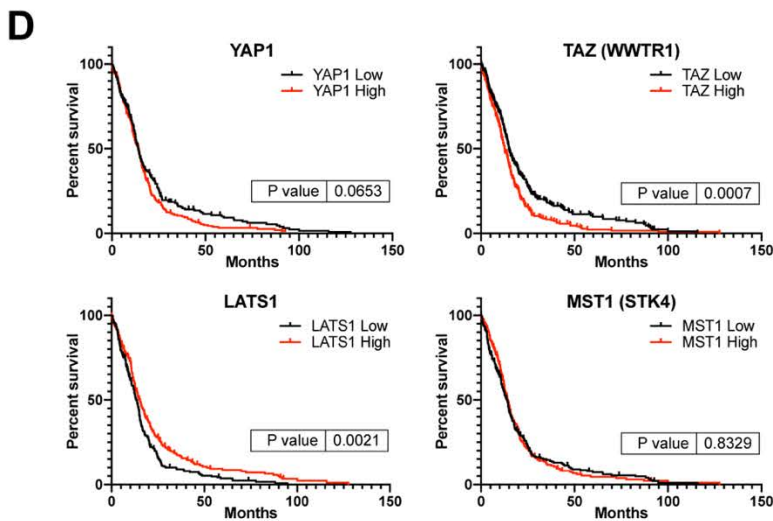

**Figure S4: Hippo pathway kinases are implicated in high tumor grade, poor survival, and associated with RTK overexpression**

**(A)** Correlation of mRNA expression of Hippo pathway member kinases with *EGFR* mRNA expression in GBM patients in the Cancer Genome Atlas database. *YAP1*(YAP) mRNA expression is positively and significantly correlated with *EGFR* mRNA expression. Other pathway members had a non-significant correlation with *EGFR* mRNA expression. Reported p-value was generated using Fisher's statistical test.

**(B)** *YAP1*, *TAZ*, and *LATS1* mRNA expression segregated by GBM tumors with *EGFR* copy number variants. *TAZ* expression is significantly increased in GBM tumors with *EGFR* copy number gain. *YAP/TAZ* regulator *LATS1* expression is significantly decreased in tumors with *EGFR* copy number gain. \*,  $p < .05$ ; \*\*,  $p < .01$ ; \*\*\*,  $p < .001$ ; \*\*\*\*,  $p < .0001$  with ANOVA multiple comparisons test.

**(C)** mRNA expression scores for *YAP1* and *TAZ* and the *YAP/TAZ* regulators *LATS1* and *MST1* in higher glioma grades. mRNA expression data from The Cancer Genome Atlas was accessed and downloaded with GlioVis. \*,  $p < .05$ ; \*\*,  $p < .01$ ; \*\*\*,  $p < .001$ ; \*\*\*\*,  $p < .0001$  with ANOVA multiple comparisons test.

**(D)** mRNA expression data from Hippo pathway members as correlated by GBM patient survival in the Cancer Genome Atlas. Higher *YAP1/TAZ* mRNA expression associates with worse GBM patient survival whereas high expression of *YAP/TAZ* regulator *LATS1* is associated with better survival in GBM patients. There was no difference in *MST1* mRNA expression related to patient survival in GBM. This data was accessed and downloaded using GlioVis and segregated into low and high mRNA expression using the median expression level as a cutoff. Reported p-value was generated using Log-rank (Mantel-Cox) statistical test.

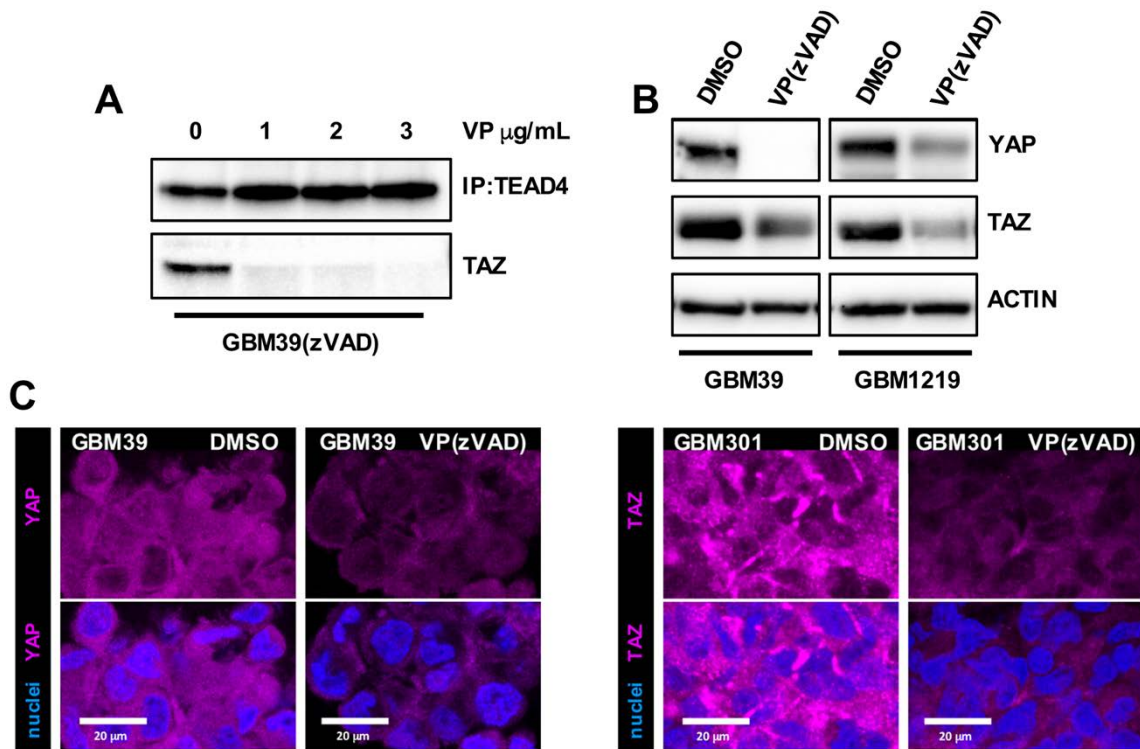

**Figure S5: YAP and TAZ function is disrupted by Verteporfin (VP)**

**(A)** GBM39 cells expressing TAZ were incubated with the indicated concentrations of VP combined with 20  $\mu\text{M}$  zVAD for 8 hours, subject to lysis and anti-TEAD4 immuno-precipitation, and the presence of TAZ in TEAD4 immunoprecipitates was probed by immunoblot. VP-mediated inhibition of TAZ-TEAD4 interaction was detected with drug doses of 1  $\mu\text{g/mL}$  and higher.

**(B, C)** **(B)** GBM39 and GBM1219 cells treated with 1  $\mu\text{g/mL}$  VP for 24 hrs. **(C)** GBM39 and GBM301 cells treated with .5  $\mu\text{g/mL}$  VP for 24 hrs; 20  $\mu\text{M}$  zVAD was included to block secondary changes caused by apoptosis. 2.5  $\mu\text{m}$  confocal optical sections of whole mount neurospheres stained for YAP or TAZ (magenta) and for all nuclei (DRAQ7, blue). Total YAP and TAZ protein levels declined with VP treatment in the presence of zVAD, as detected by immunoblots and confocal imaging of GSCs, with reduced YAP and TAZ nuclear localization in GSCs.

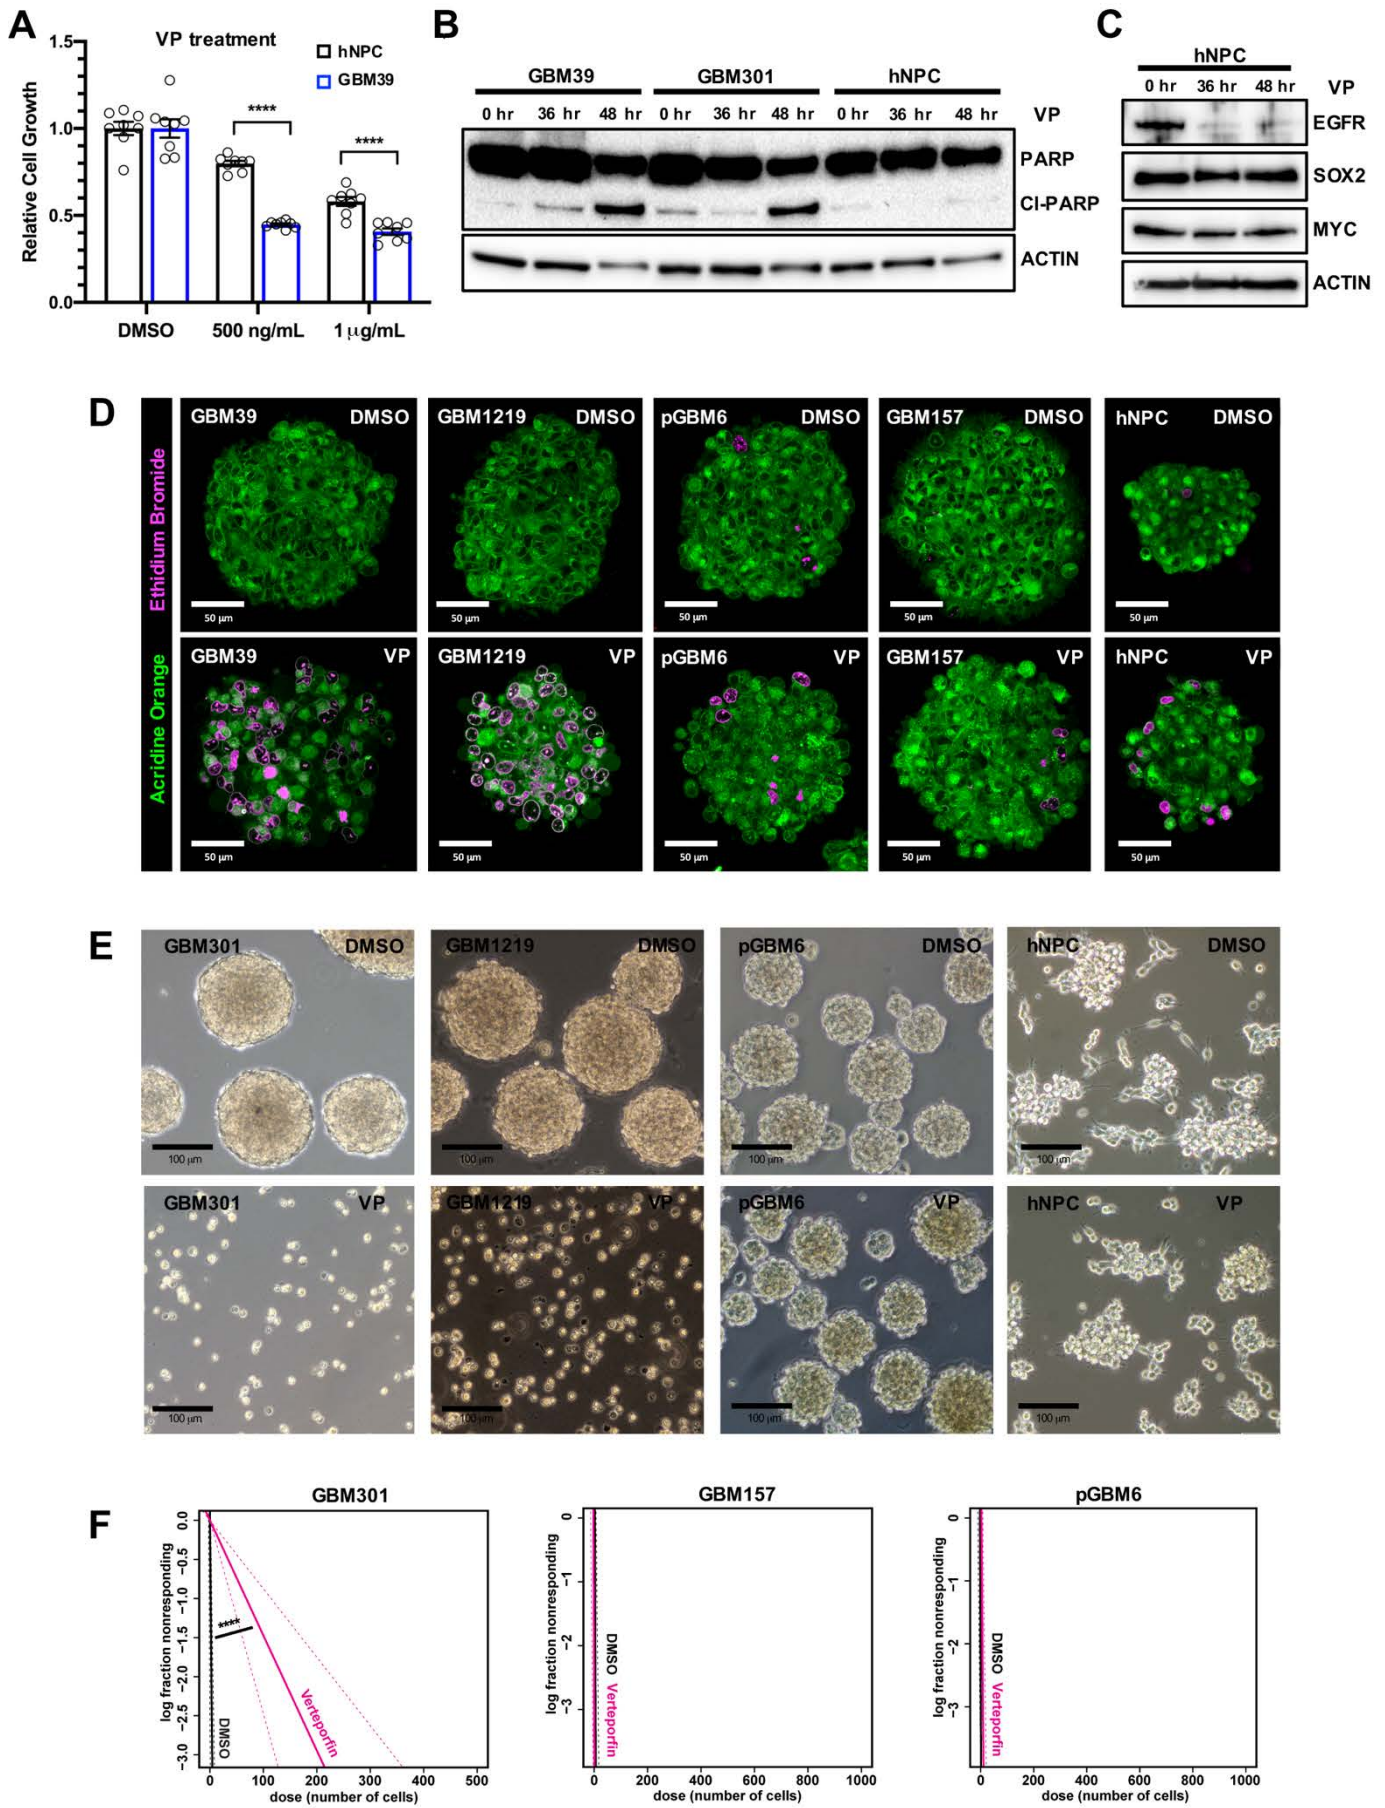



**Figure S6: Verteporfin preferentially targets GBM stem cells**

**(A)** hNPCs (black bars) and GBM39 (blue bars) were treated with the indicated concentrations of VP for 48 hours and observed for cell growth/viability via WST-1 assay. All replicates are indicated individually as circle icons for each bar representing each cell type and condition. Statistical comparisons made between the effects of DMSO and VP on GBM39 and hNPCs, \*\*\*\*  $p < .0001$  with multi two-stage two-tailed t-tests.

**(B)** Cultured GBM39 and GBM301 GSCs and hNPCs were incubated with 1  $\mu\text{g}/\text{mL}$  VP for 36 and 48 hours, harvested for protein lysates, and examined by immunoblot for PARP protein to assess apoptosis; the presence of cleaved PARP (Cl-PARP) indicates apoptosis.

**(C)** Protein expression of EGFR, SOX2, and MYC in hNPCs neurospheres following VP treatment for 36 and 48 hours. Non-adherently cultured cells were treated with 1  $\mu\text{g}/\text{mL}$  VP and harvested at the indicated timepoints for protein.

**(D)** Representative images from established GSC and hNPC neurosphere cultures treated with .5  $\mu\text{g}/\text{mL}$  of VP for 24 hours. Apoptosis was visualized by ethidium bromide (magenta) dye exclusion assays. Acridine orange (green) used to counterstain cell bodies. 3  $\mu\text{m}$  confocal optical projections.

**(E)** Established GBM301 and GBM1219 GSCs treated with VP for 3 days to determine the gross effect of VP on neurosphere survival and growth as compared to YAP/TAZ-negative pGBM6 GSCs and control hNPC neurospheres. GBM301, GBM1219, and hNPCs cells were treated with 1  $\mu\text{g}/\text{mL}$  VP or DMSO as a control, and pGBM6 cells were treated with 3  $\mu\text{g}/\text{mL}$  VP or DMSO as a control.

**(F)** Limiting dilution assays in which GSCs and hNPCs were plated at low density of 1-1000 cells per well in 96 well plates, incubated with 1  $\mu\text{g}/\text{mL}$  VP, and observed for neurosphere formation after 7 days. \*\*\*\*  $p < .0001$  with chi-squared test.

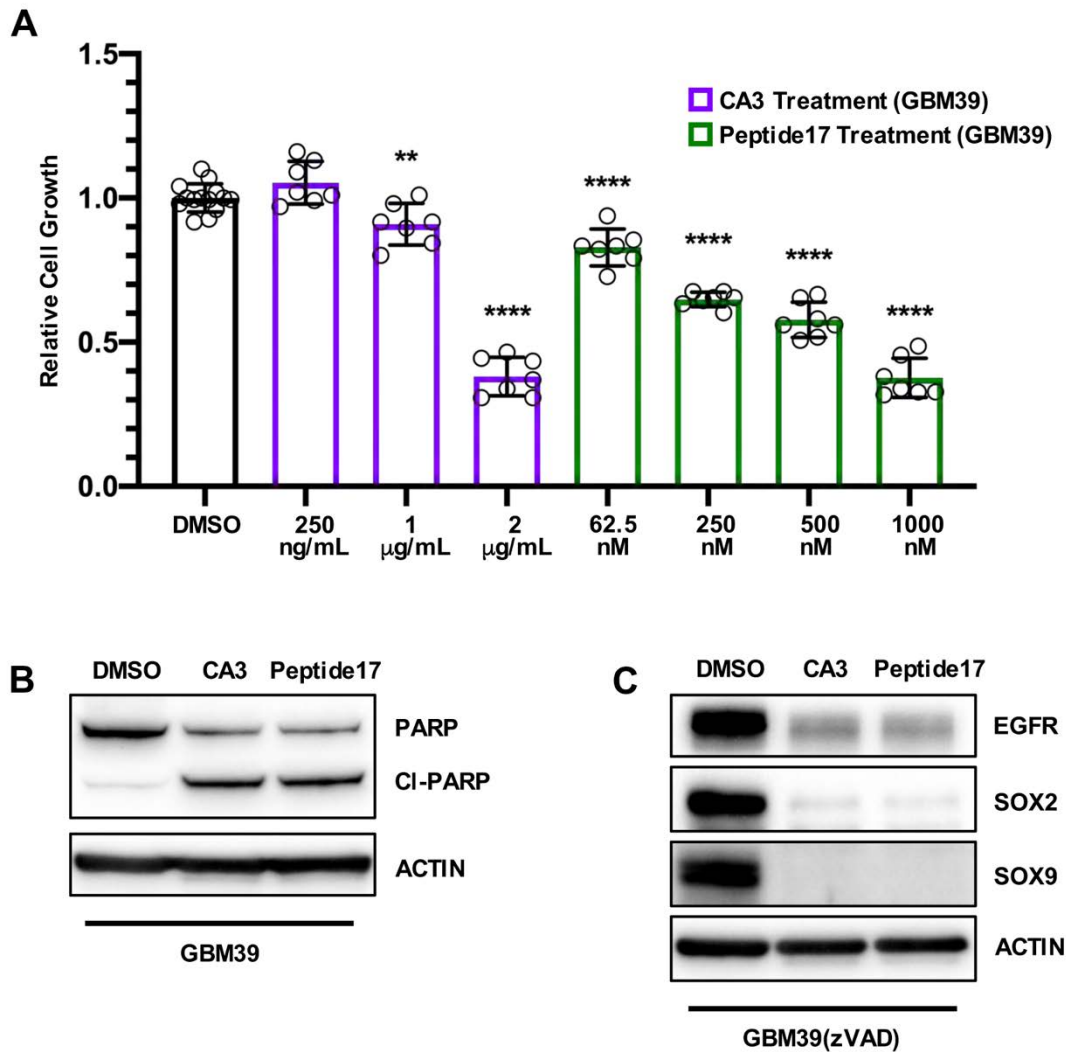

**Figure S7: Alternate YAP/TAZ-TEAD inhibitors target GBM cell survival and reduce stem cell gene expression**

**(A)** CA3 and Peptide17, which are small molecule inhibitors of the interaction between YAP and TAZ and the TEADs, were tested to determine if they affect GMB39 cell growth and viability in a dose-dependent manner. GBM39 GSCs were incubated with indicated concentrations of CA3 or Peptide17 for 48 hours and observed for growth/viability via WST-1 assay. For comparison, these assays were run alongside VP WST-1 assays shown in Figure 3B, so both plots shown here use the same set of DMSO treated control samples as a result. \*\*  $p < .01$ ; \*\*\*  $p < .001$ ; \*\*\*\*  $p < .0001$  with multi two-tailed t-tests.

**(B)** Immunoblot for PARP cleavage (CI-PARP) to assess apoptosis in GBM39 GSCs following treatment with DMSO, 1  $\mu\text{g}/\text{mL}$  CA3, or 500 nM Peptide17 treatment for 24 hours.

**(C)** EGFR, SOX2, and SOX9 protein expression of in GBM39 GSCs following treatment with DMSO, 1  $\mu\text{g}/\text{mL}$  CA3, or 500 nM Peptide17 treatment for 24 hours, 20  $\mu\text{M}$  zVAD used to prevent apoptosis and preserve signaling pathways.

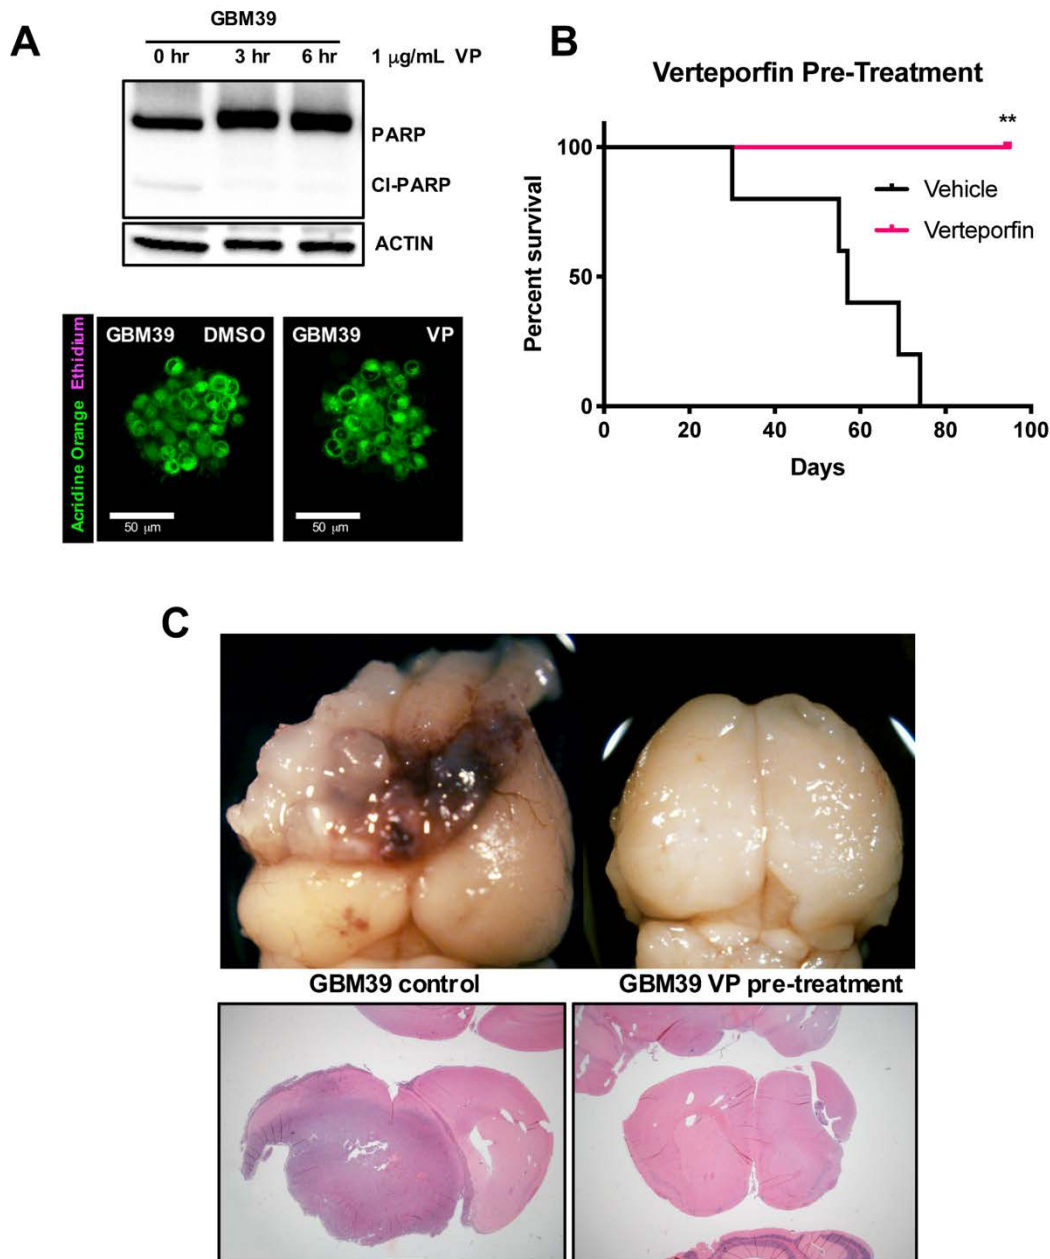

**Figure S8: Short-term pre-treatment of GSCs with Verteporfin reduces their tumorigenicity**

**(A)** GBM39 GSCs treated with 1  $\mu$ g/mL VP for 3 and 6 hours. Apoptosis was assessed by immunoblotting for PARP cleavage and by ethidium bromide absorption in dye exclusion assays. 3  $\mu$ m confocal optical sections.

**(B)** Kaplan-Meier curve showing survival of NSG mice orthotopically implanted GBM39 GSCs pre-treated with 1  $\mu$ g/mL VP or DMSO (vehicle control) for 4-6 hours. \*\*  $p < .01$  with Log-rank (Mantel-Cox) test ( $n=5$  for each treatment group).

**(C)** Representative photos and H&E stains are depicted of brains from animals implanted with DMSO (vehicle control) or VP-treated GSCs.

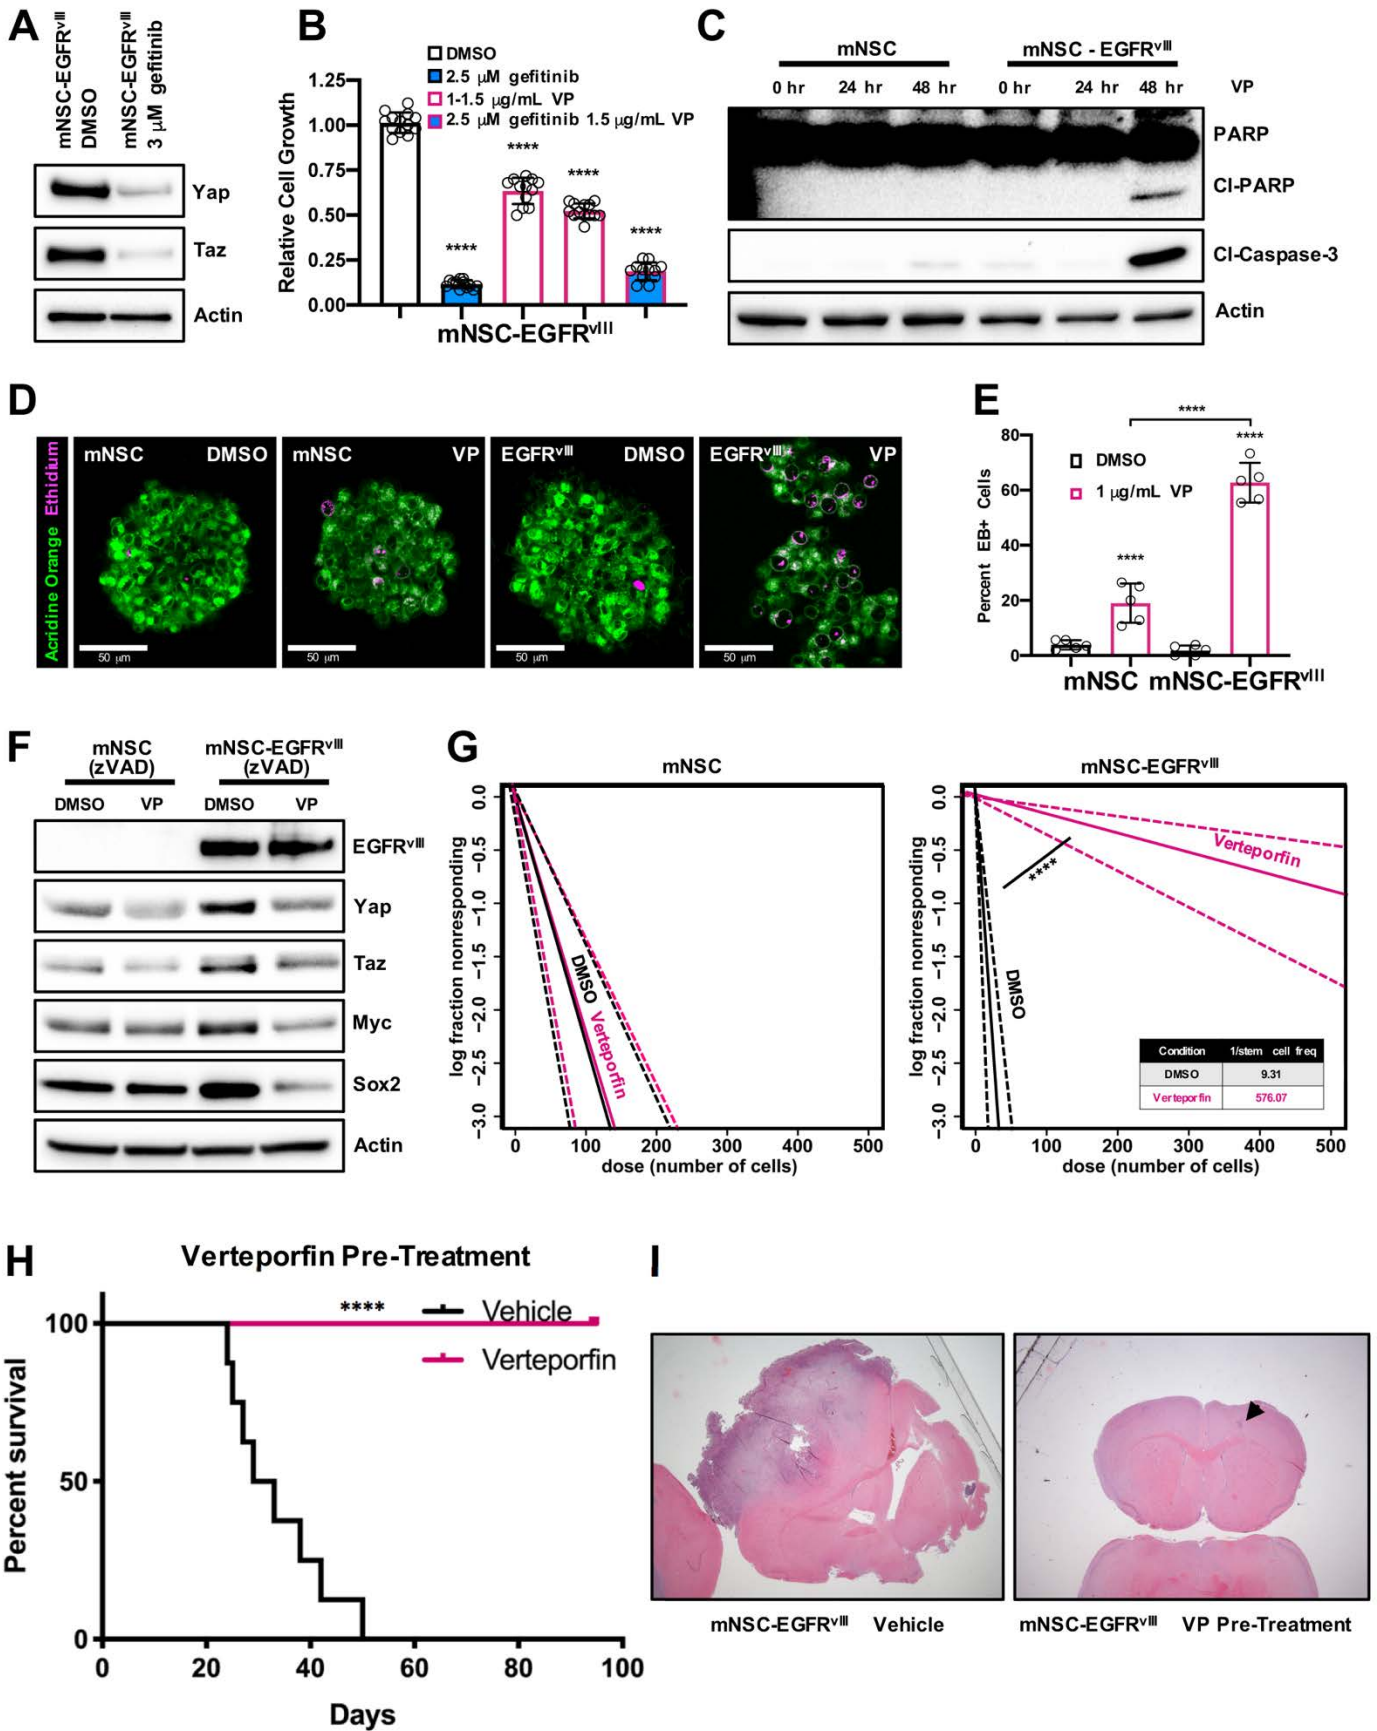

**Figure S9: EGFR<sup>vIII</sup> transformed mNSCs are sensitive to Verteporfin**

**(A)** *EGFR<sup>vIII</sup>; Cdkn2a<sup>-/-</sup>; Pten<sup>-/-</sup>* mNSC neurospheres treated with DMSO or 2.5  $\mu$ M/mL gefitinib for 24 hours, and then harvested for immunoblots to determine if EGFR kinase inhibition affected Yap and Taz protein levels.

**(B)** WST-1 assay on *EGFR<sup>vIII</sup>; Cdkn2a<sup>-/-</sup>; Pten<sup>-/-</sup>* mNSCs to examine their viability and growth in response to gefitinib and VP alone or combined. mNSCs were treated with DMSO as a control, VP at the indicated dose for 24 hrs, or with 2.5  $\mu$ M gefitinib alone for 48 hours. Combination treatment involved 2.5  $\mu$ M gefitinib for 24 hours followed by another 24 hrs of both 2.5  $\mu$ M gefitinib and 1  $\mu$ g/mL VP: this sequential design was meant to determine whether EGFR kinase inhibition rescued cells from VP or if VP had off-target effects distinct from EGFR inhibition. \*\*\*\*  $p < .0001$  with one-way ANOVA relative to DMSO control.

**(C)** *EGFR<sup>vIII</sup>; Cdkn2a<sup>-/-</sup>; Pten<sup>-/-</sup>* and control *Cdkn2a<sup>-/-</sup>; Pten<sup>-/-</sup>* mNSC neurosphere cultures were incubated with 1  $\mu$ g/mL VP for 24 and 48 hours, harvested for protein lysates, and assessed for apoptosis by immunoblot for cleaved-Caspase-3 (Cl-Caspase-3) and cleaved PARP (Cl-PARP).

**(D, E)** Representative images from *EGFR<sup>vIII</sup>; Cdkn2a<sup>-/-</sup>; Pten<sup>-/-</sup>* mNSCs and *Cdkn2a<sup>-/-</sup>; Pten<sup>-/-</sup>* mNSC neurosphere cultures treated with 1  $\mu$ g/mL of VP for 24 hours. Apoptosis was visualized by ethidium bromide (magenta) dye exclusion assays. Acridine orange (green) used to counterstain cell bodies. 3  $\mu$ m confocal optical projections. Graphs show the percentage of ethidium bromide-positive cells in the indicated mNSC cultures, counted in 25  $\mu$ m optical projections. \*\*\*\*  $p < .0001$  with ANOVA multiple comparisons test.

**(F)** Yap, Taz, EGFR<sup>vIII</sup>, and tumor stem cell marker (Myc, Sox2) protein expression levels in the indicated mNSCs treated with 1  $\mu$ g/mL VP or DMSO as a control for 24 hour; ZVAD (20  $\mu$ M) was used to prevent the effects of apoptosis.

**(G)** Limiting dilution assay in which *EGFR<sup>vIII</sup>; Cdkn2a<sup>-/-</sup>; Pten<sup>-/-</sup>* mNSCs and *Cdkn2a<sup>-/-</sup>; Pten<sup>-/-</sup>* mNSCs were plated at low density of 1-500 cells per well in 96 well plates, incubated with 1.5  $\mu$ g/mL VP, and observed for neurosphere formation after 5 days. \*\*\*\*  $p < .01$  with chi-squared test.

**(H)** Kaplan-Meier curve showing survival of NSG mice orthotopically implanted with *EGFR<sup>vIII</sup>; Cdkn2a<sup>-/-</sup>; Pten<sup>-/-</sup>* mNSCs pre-treated with 1  $\mu$ g/mL VP or DMSO (vehicle control) for 4-6 hours (n=9 for VP treatment, n=8 for controls). \*\*\*\*  $p < .0001$  with log-rank (Mantel-Cox) test.

**(I)** Representative photos and H&E stains are depicted of brains from animals implanted with DMSO (vehicle control) and VP-treated *EGFR<sup>vIII</sup>; Cdkn2a<sup>-/-</sup>; Pten<sup>-/-</sup>* mNSCs. Arrow indicates gliosis and likely needle scar in the pictured vehicle control section.

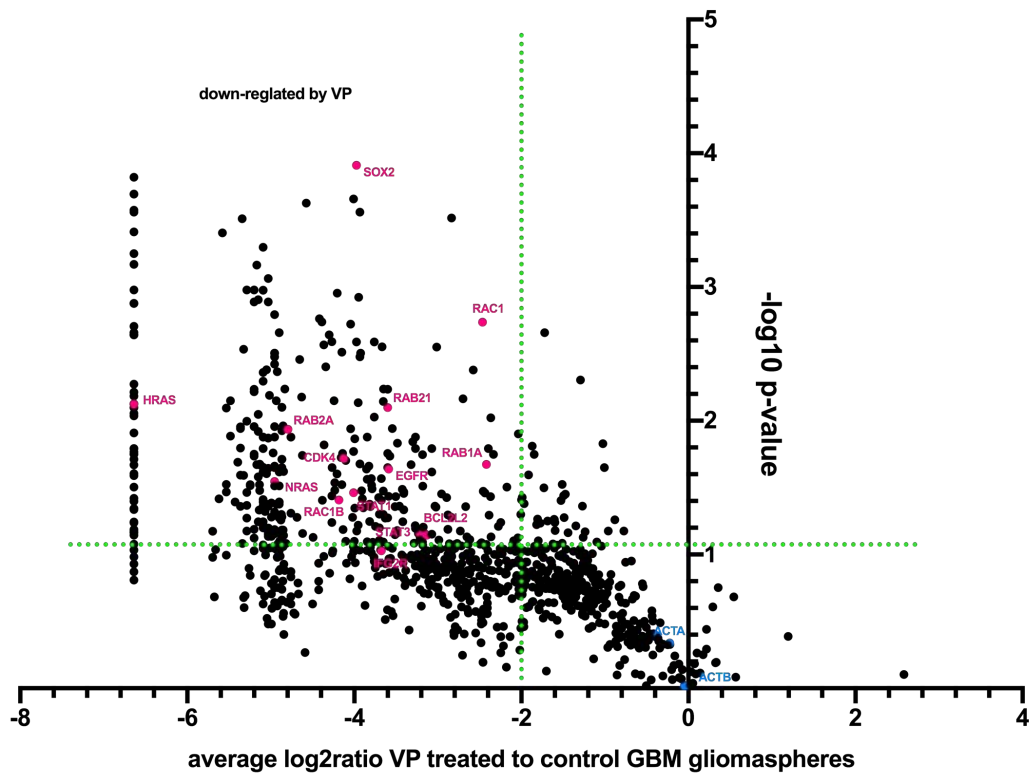

**Figure S10: Short-term treatment of GSCs with Verteporfin reduces protein expression**

GBM301 and pGBM2 (both EGFR<sup>viii</sup>) and GBM1219 (EGFR wild-type) GSCs were treated with VP for 6 hours and subjected to label-free total proteomic profiling. Volcano plot showing individual proteins graphed by log<sub>2</sub> ratio and -log<sub>10</sub> of p-value from t-tests comparing protein levels in all VP treated GSC lines to control GSC lines. The vertical green dashed line demarcates proteins that show  $\geq 2$ -fold of decrease in expression induced by VP treatment and the horizontal green line demarcates p-values  $\geq .05$ . Pink highlights proteins that show reduced protein levels in response to VP that have been confirmed by immunoblot (see Figure S11). Blue shows ACTIN control proteins, which did not change in response to VP treatment.

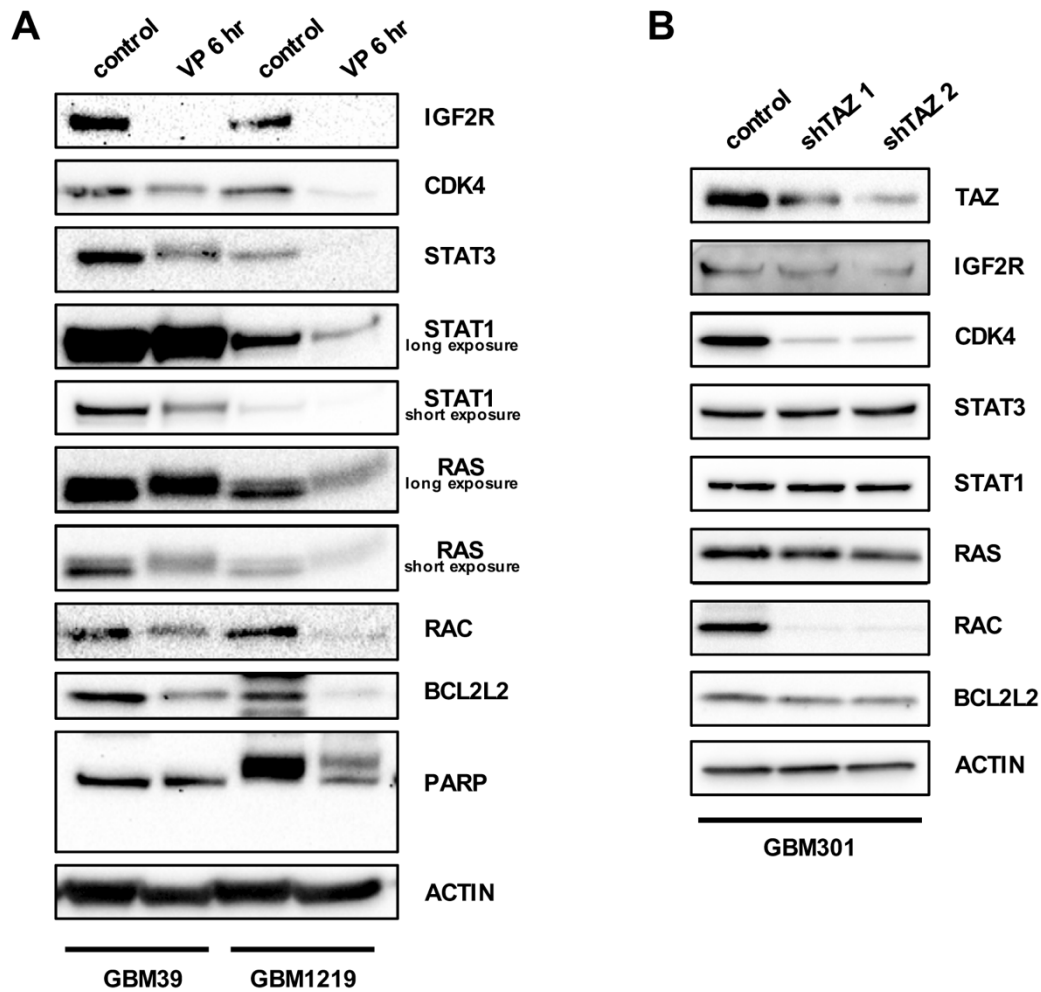

**Figure S11: Short-term pre-treatment of GSCs with Verteporfin reduces expression of YAP/TAZ-dependent and independent target genes**

**(A)** GBM39 and GBM1219 GSCs treated with VP for 6 hours, at which times apoptosis was not readily detected, as indicated by immunoblotting for PARP cleavage. Confirmatory immunoblots for several proteins that showed significantly reduced expression by proteomic profiling, including proteins that control cell proliferation (CDK4), signaling (IGF2R, STAT3, STAT1, RAS proteins, RAC proteins) and cell survival (BCL2L2).

**(B)** Lentiviral shRNA knockdown of TAZ in GBM301 GSCs caused decreased protein expression of several proteins that are targeted by VP treatment (IGF2R, CDK4, RAC proteins), but not of others (STAT3, STAT1, RAS, BCL2L2). Cells were treated with ZVAD (20  $\mu$ M) to prevent apoptosis and preserve signaling pathways and harvested 3 days post-infection.

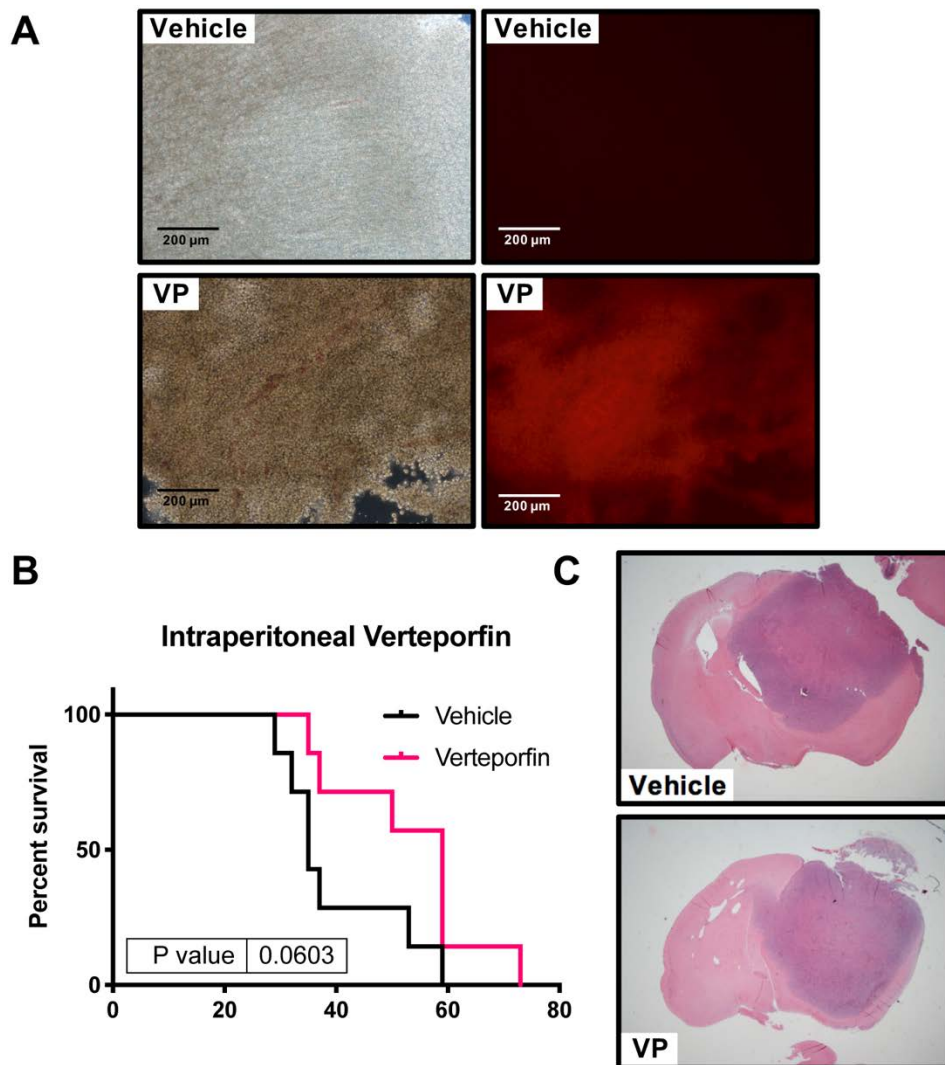

**Figure S12: Intraperitoneal delivery of Verteporfin was detected in tumor-bearing mice and extended survival**

**(A)** Representative micrographs of unfixed brain tissue sections from GBM39 xenografts in NSG mice showing VP absorption into brain tumor tissue following IP injection. Xenograft-bearing NSG mice were injected IP with Visudyne (pharmaceutical grade liposomal VP) at 100 mg/kg or with saline (vehicle), their brains removed 6-8 hours following injection to allow for VP to enter the circulatory system and brain, and their unfixed brains sliced into sections with a vibratome. VP absorption was visualized by fluorescence microscopy for far red emission in response to blue light excitement (390-435 nm/620-680 nm band pass filter set).

**(B)** Kaplan-Meier survival curve from orthotopic tumor-bearing mice that indicates a survival benefit for VP-treated mice. Mice were treated with Visudyne by IP injection at 100 mg/kg every other day for a total of 8 doses over two weeks; control animals were treated by IP injection of equivalent volumes of sterile phosphate-buffered saline for a total of 8 times for two weeks. No gross toxicities were observed from Visudyne treatment. Statistical test for survival curve performed with Log-rank (Mantel-Cox) test, (n=7 for each treatment group).

**(C)** Representative images from H&E stained brain sections from mice at the survival endpoints from vehicle and VP-treated experimental arms.



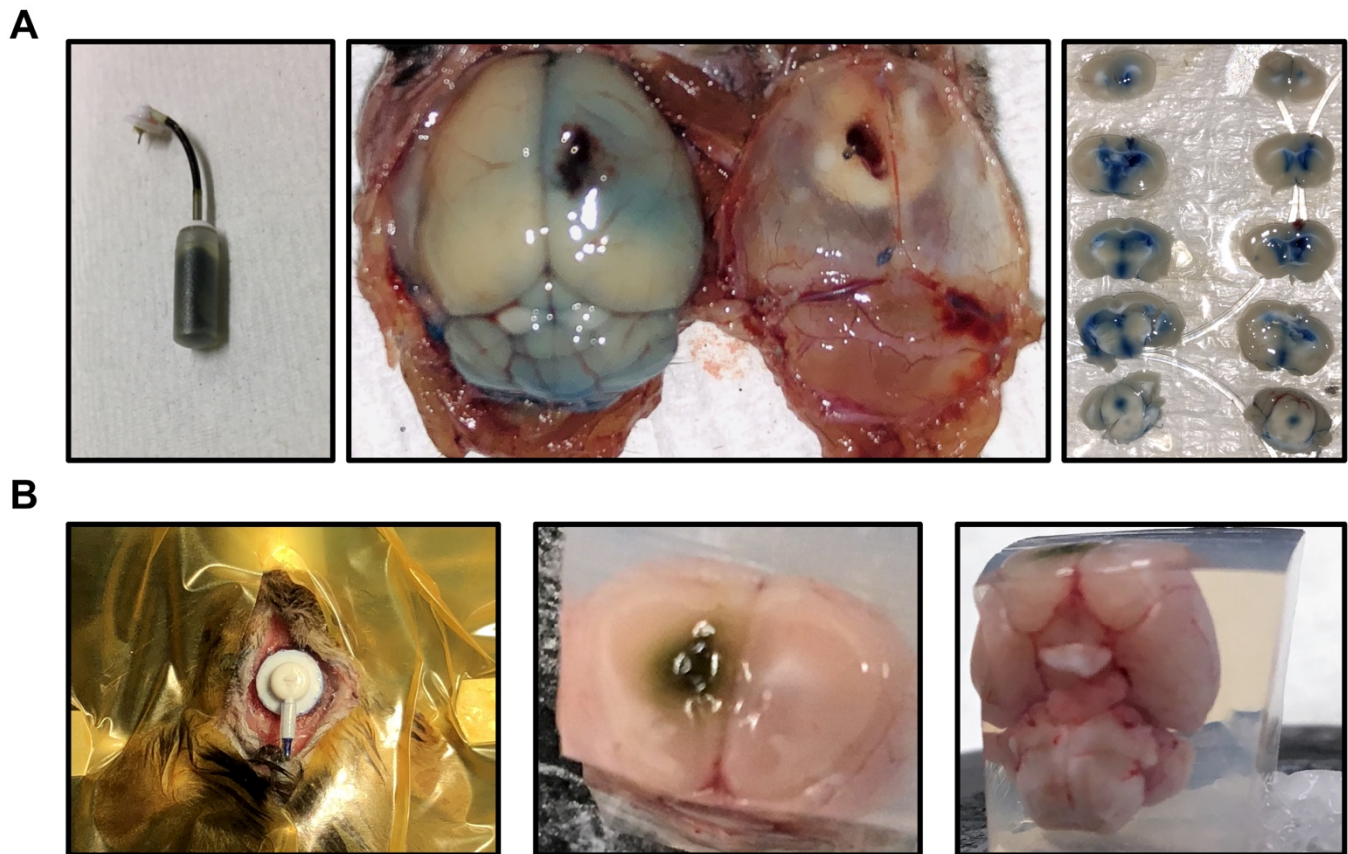

**Figure S13: Osmotic pump implantation and proof of concept**

**(A)** Images depicting Alzet micro-osmotic pump assembly (left) and successful delivery of Evans blue dye on a trial run of pump implantation (middle and right). Osmotic pumps were assembled, filled with dye, and primed in saline at 37°C overnight before implantation. Mice were implanted with pump cannula 1 mm laterally to the right and 0.5 mm posterior to bregma and sacrificed 72 hours after pump implantation to visualize dye localization and pump placement efficiency.

**(B)** Images depicting pump cannula placement onto mouse skull for VP-filled pump (left), and visualization of VP absorption (VP is visibly dark green) upon removal of mouse brain and preparation for sectioning, which was used in **Figure 6A**. Osmotic pump was loaded as in panel **(A)** with liposomal VP (200 mg in 100 ml, Visudyne) and implanted into mice for fourteen days of continuous drug delivery. Unfixed brains from mice were then immobilized into agarose blocks for vibratome sectioning (right).

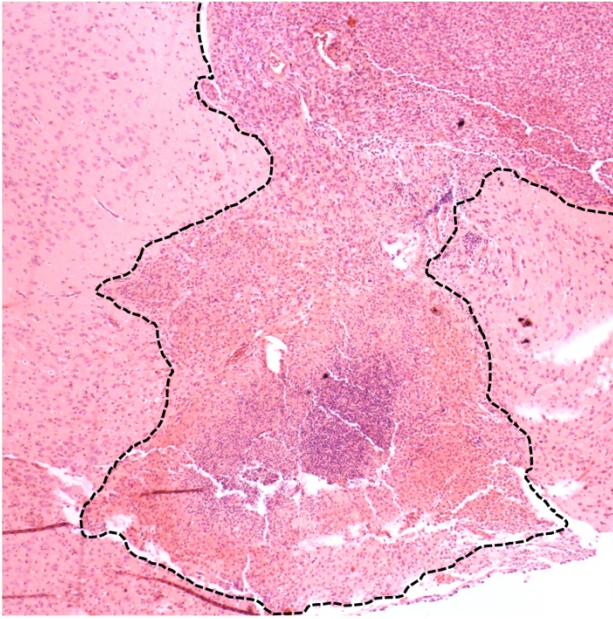

**Figure S14: Verteporfin treatment results in tumor necrosis and decreased expression of EGFR and SOX2**

Low magnification images of a representative GBM xenograft tumor mass after treatment with VP by osmotic pump. Images of H&E (top), and IHC staining for EGFR (middle) and SOX2 (bottom) expression are matched to the tumor location imaged in Figure 5 in the region treated with VP by osmotic pump. Dashed outline shows full extent of tumor growth and infiltration. H&E used to score for necrosis and tissue viability and to evaluate tumor size and location.

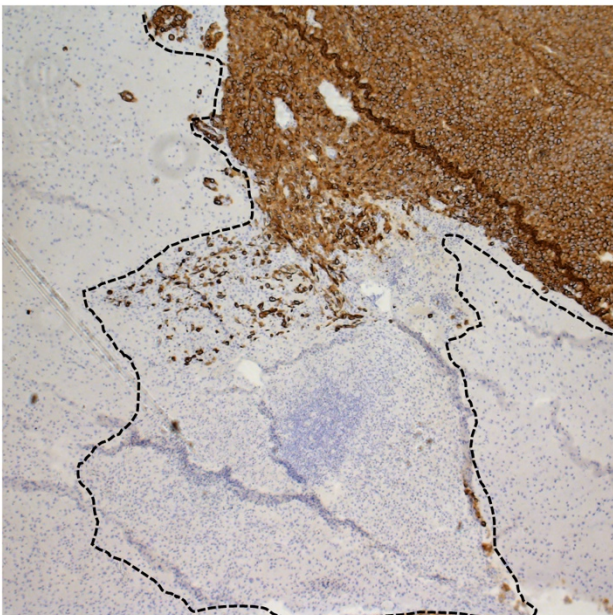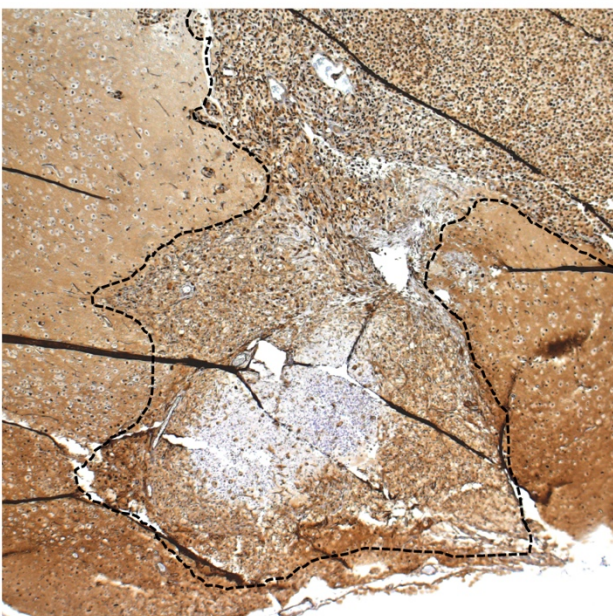

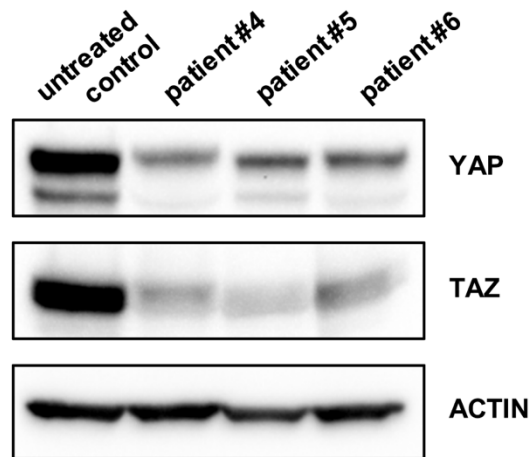

### (Visudyne) treated patients

Total tissue lysates from GBM surgical specimens blotted for YAP and TAZ total protein. Tumor tissue from all patients was collected under similar conditions intraoperatively, flash frozen on dry ice, and lysed directly in RIPA buffer upon thawing before immunoblotted. For liposomal VP (Visudyne) treated patients (patients #4, 5, 6 on Table S5), intraoperative fluorescence was used during surgery to illuminate the tumor bed during resection, such that light exposure may have affected the tumor tissue. The untreated control case chosen for comparison is tumor tissue from a representative EGFR-amplified case, from a patient that did not receive VP or intraoperative fluorescence. Note that we cannot be certain that these tumors all expressed equivalent levels of YAP and TAZ prior to Verteporfin infusion or intraoperative fluorescence or tissue collection, so we cannot necessarily attribute differences in YAP and TAZ protein expression levels between patients to Visudyne treatment.

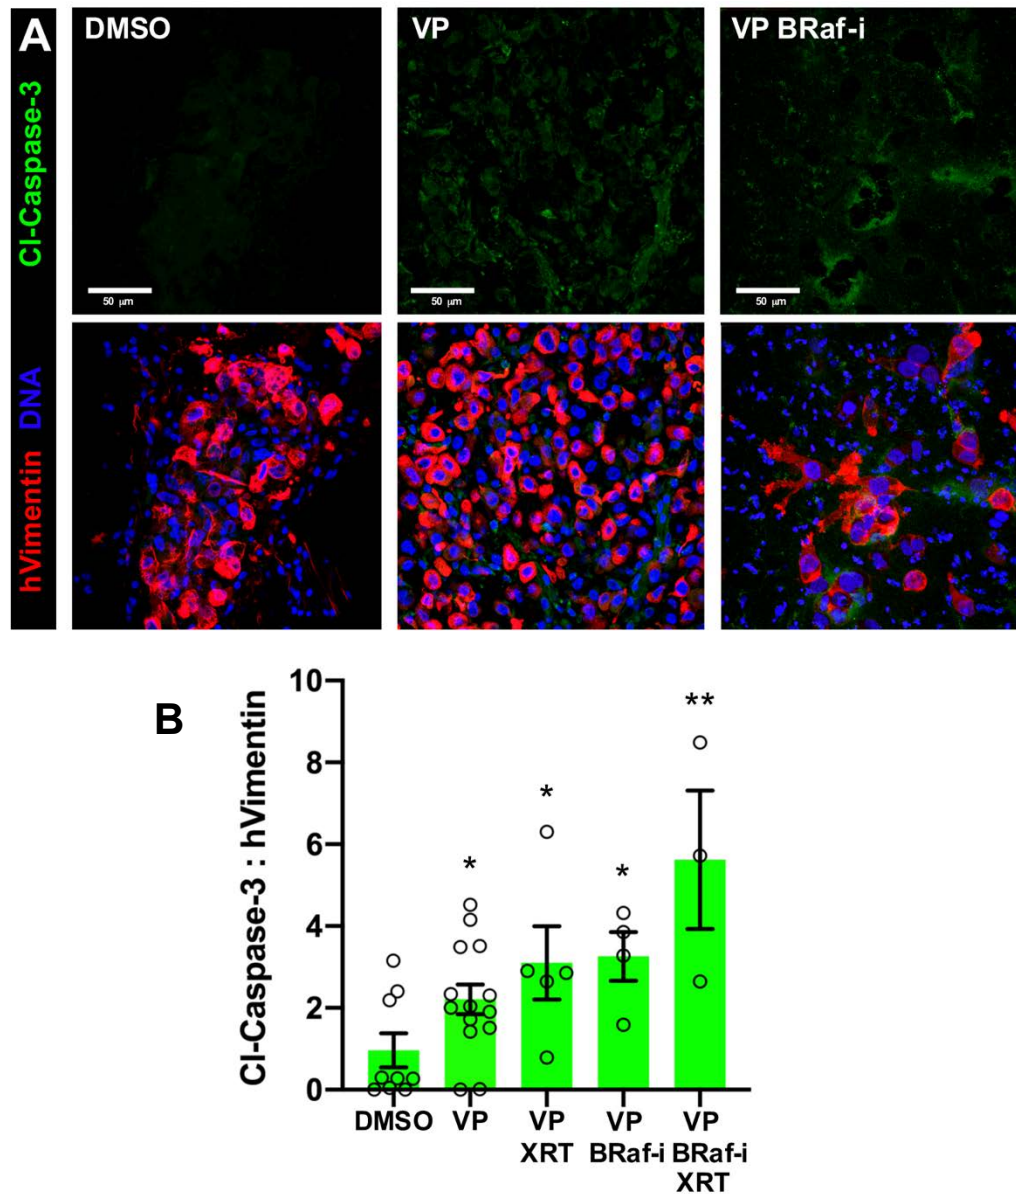

**Figure S16: Apoptosis in response to Verteporfin is enhanced by combination therapy**

*Ex vivo* organotypic slice cultures created from GBM39 xenografts implanted into NSG mice, treated with DMSO (control), 1  $\mu\text{g}/\text{mL}$  VP for 24 hours, and/or other indicated agents, and then stained and imaged with confocal microscopy. DRAQ7 DNA dye (blue) labels all cell nuclei in tumor and stroma. VP was combined with concurrent 10  $\mu\text{M}$  dabrafenib (BRaf-inhibitor, 24 hrs) and/or 2 Gy of radiation (XRT) delivered 12 hrs following VP addition.

**(A)** Immunostaining for cleaved-Caspase-3 (CI-Caspase-3, green, upper panels), labeling apoptotic cells, and human Vimentin (hVimentin, red, lower panels overlay), which specifically labels human tumor cells in the mouse brain parenchyma.

**(B)** Ratios for total cleaved-Caspase-3 and hVimentin immunostaining in organotypic slice cultures; values measured in 30-50  $\mu\text{m}$  confocal z-stacks using Imaris.

\*  $p < .05$ ; \*\*  $p < .01$  with ANOVA multiple comparisons test.

| stock ID number | CG number | gene name       | <i>dEGFR<sup>A</sup>;dp110<sup>CAAX</sup></i> phenotype | wild-type phenotype |
|-----------------|-----------|-----------------|---------------------------------------------------------|---------------------|
| b27661          | CG11228   | hippo           | E                                                       | no obvious effect   |
| v104169         | CG11228   | hippo           | E                                                       | no obvious effect   |
| v106174         | CG12072   | warts           | E                                                       | no obvious effect   |
| v9928           | CG12072   | warts           | E                                                       | no obvious effect   |
| b34067          | CG4005    | yorkie          | SS                                                      | no obvious effect   |
| v109756         | CG4005    | yorkie          | SS                                                      | no obvious effect   |
| b55404          | CG3595    | scalloped       | SS                                                      |                     |
| b35481          | CG3595    | scalloped       | SS                                                      |                     |
| v60101          |           | 40D-UAS control | no effect                                               | no effect           |

**Table S1. Testing dsRNAs targeting Hippo-Yki pathway.**

VDRG stock ID numbers prefaced by "v," Bloomington stock ID numbers prefaced by "b." Bold highlights stocks that yielded reproducible genetic interactions and clear phenotypic alterations. Key to genetic interactions: E: enhancer SS: strong suppressor, WS: weak suppressor; no effect indicates that there were no obvious phenotypic differences between the dsRNA and control animals; nd indicates not determined. All UAS-dsRNAs expressed from in glia by the repo-Gal4 driver.

|                  | <b>Sex</b> | <b>Age</b> | <b>Dose</b> | <b>Drug-Related Side Effects</b> | <b>Intra-op Fluor</b> | <b>Pathology</b>                                      | <b>Follow-up</b>                       |
|------------------|------------|------------|-------------|----------------------------------|-----------------------|-------------------------------------------------------|----------------------------------------|
| <i>Patient 1</i> | M          | 51         | 0.15mg/kg   | None                             | None                  | Necrosis                                              | Died 1/1/19<br>14 months               |
| <i>Patient 2</i> | F          | 62         | 0.3mg/kg    | None                             | Yes                   | Therapy-related changes with residual / recurrent GBM | 3/3/19<br>13 months                    |
| <i>Patient 3</i> | M          | 62         | 0.3mg/kg    | None                             | Yes                   | GBM                                                   | 6/14/19<br>13 months                   |
| <i>Patient 4</i> | M          | 60         | 0.3mg/kg    | None                             | Yes                   | GBM                                                   | 12/11/18 Lost to follow up<br>4 months |
| <i>Patient 5</i> | M          | 33         | 0.3mg/kg    | None                             | Yes                   | GBM, IDH Mut                                          | 12/7/18 Lost to follow up<br>4 months  |
| <i>Patient 6</i> | M          | 38         | 0.3mg/kg    | None                             | Yes                   | GBM                                                   | 6/20/19                                |

**Table S2. Patient information for phase 0 clinical trial.**

Six patients were administered Visudyne prior to surgical resection or recurrent disease. Patient sex and age are listed along with dose of medication administered. Dose was escalated to 0.3mg/kg after the first patient tolerated infusion and there was no evidence of fluorescence, however, this may have been a consequence of the lesion being consistent with radiation necrosis rather than recurrent glioblastoma. There were no drug related side effects. The end goal of this study was to identify qualitative intra-operative fluorescence (Yes/No) and collect tissue for post-operative qualitative and quantitative analysis. We were able to successfully demonstrate drug uptake in patients with glioblastoma.

**Table S3. List of Abbreviations, Acronyms, and Symbols.**

5-ALA: 5-aminolevulinic acid, protoporphyrin IX precursor  
 bp: base pair  
 CNS: central nervous system  
 CAAX: CAAX prenylation sequence  
 ChIP: chromatin-immunoprecipitation  
 CDK1: cyclin-dependent kinase 1, gene and protein name  
 C-MYC: transcription factor, gene and protein name  
 DMSO: dimethyl sulfoxide  
 Drosophila: *Drosophila melanogaster*, vinegar or fruit fly  
 EGFR: Epidermal Growth Factor Receptor, gene and protein name  
 EGFR<sup>viii</sup>: Epidermal Growth Factor Receptor, mutant variant III  
 FDA: Food and Drug Administration  
 GBM, GBMs: glioblastoma  
 GFP: green-fluorescent protein, gene and protein name  
 GSC: gliomasphere, serum-free neurosphere culture of glioblastoma tumor stem-like cells  
 hNPC, hNPCs: human neural progenitor cells  
 IGF2: Insulin-like Growth Factor 2, gene and protein name  
 IHC: immunohistochemistry  
 IND: investigational new drug application  
 Ink4a/Arf-/- : mouse gene name, products of the CDKN2A locus, tumor suppressors, gene and protein names  
 IP: intraperitoneal injection  
 IV: intravenous injection  
 LATS1: Large Tumor Suppressor Kinase 1, gene and protein name  
 LATS2: Large Tumor Suppressor Kinase 2, gene and protein name  
 MET: MET receptor tyrosine kinase, gene and protein name  
 mNSC, mNSCs: mouse neural stem cells  
 mRNA: messenger RNA  
 MST1: Hippo kinase 1, gene and protein name  
 MST2: Hippo kinase 2, gene and protein name  
 PDGFRA: PDGFalpha receptor, gene and protein name  
 PI3K: Phospho-inositol-3 kinase, Pi-3 kinase, a cell signaling pathway  
 PPIX: protoporphyrin IX, porphyrin  
 PTEN: Phosphatase and tensin homolog, lipid phosphatase for Phospho-inositol-3  
 qPCR: quantitative PCR  
 RAF: protein kinase, named for virus-induced Rapidly Accelerated Fibrosarcoma, gene and protein name  
 Ras: small GTPase that acts downstream of RTKs and upstream of RAF  
 RNAseq: mRNA isolation coupled with next generation sequencing  
 RTK: Receptor-tyrosine kinase, a cell signaling pathway linked to Ras and RAF  
 RNAi: RNA-interference method of gene silencing  
 Sd: Scalloped transcription factor, *Drosophila melanogaster*, gene and protein name  
 shRNAs: small-hairpin RNAs, used for RNAi  
 SOX2: SRY-box 2 transcription factor, gene and protein name  
 TAZ: transcriptional coactivator with PDZ-binding motif, gene and protein name  
 TCGA: The Cancer Genome Atlas  
 TEAD: TEA domain proteins, gene and protein name  
 TMA: tissue microarray  
 VP: Verteporfin  
 XRT: ionizing radiation  
 Yki: Yorkie transcription factor, *Drosophila melanogaster*, gene and protein name  
 YAP: Yes-associated Protein 1, YAP1 transcription factor, gene and protein name  
 ZVAD: Z-VAD-FMK, carbobenzoxy-valyl-alanyl-aspartyl-[O-methyl]-fluoromethylketone, pan-caspase inhibitor

| Sample | Genotype  |                  | Genotype                                         | IHC results |                                         |      |
|--------|-----------|------------------|--------------------------------------------------|-------------|-----------------------------------------|------|
|        | Tumor     | EGFR status      |                                                  | Other RTKs  | other genetic lesions, genomics results | EGFR |
| 131    |           |                  | PTEN loss, NTRK2 overexpression                  | 4           | 3                                       | 3    |
| 923    |           | PDGFRA amp       | SOX2 amp; AKT gain; CDKN2A loss                  | 4           | 2                                       | 4    |
| 128B   | EGFR gain |                  | MDM4 PIK3C2B gain; PTEN CdkN2a loss              | 4           | 3                                       | 4    |
| 29     | EGFR amp  |                  | PI3KC2B, MDM4 gain; PTEN LOH                     | 4           | 4                                       | 4    |
| 430    | EGFR amp  |                  | CDKN2A and PTEN loss                             | 4           | 3                                       | 4    |
| 211    | EGFR amp  |                  | PTEN TP53 loss                                   | 3           | 3                                       | 3    |
| 724    |           |                  | IDH1 mutant; CIC TP53 loss                       | 2           | 1                                       | 1    |
| 222    |           |                  | CDK4, CDK6 amp; SOX2 gain; PTEN loss             | 3           | 3                                       | 4    |
| 729    | EGFR gain | NTRK3 amp        | NMYC gain; PTEN, ATRX loss                       | 3           | 2                                       | 3    |
| 925    | EGFR amp  |                  | MDM2 gain; PTEN CDKN2A loss; MGMT methylation    | 4           | 3                                       | 3    |
| 508    |           | PDGFRA amp       | PIK3C2B mutation                                 | 2           | 1                                       | 1    |
| 914    | EGFR amp  |                  | PTEN, TP53 loss; GLI3 amp                        | 4           | 1                                       | 4    |
| 1215   |           | PDGFRA, KIT gain | PTEN CDKN2A loss; MGMT methylation               | 1           | 2                                       | 2    |
| 212A   | EGFR gain | MET amp          | PIK3CA gain; PTEN LOH; TP53 NF1, and CDKN2A loss | 3           | 3                                       | 3    |
| 1023B  |           |                  | IDH mutant; MGMT methylation                     | 2           | 1                                       | 2    |
| 1023A  |           | PDGFRA amp       | BRAF MDM2 amp                                    | 1           | 0                                       | 2    |
| 1219   | EGFR amp  |                  | PTEN loss, SHH gain                              | 4           | 3                                       | 4    |
| 109A   |           | PDGFRA, KIT gain | SOX2 amp; RB1 CDKN2A loss; PTEN LOH              | 2           | 3                                       | 4    |
| 1217   |           |                  | TP53, PTEN, CDKN2A loss                          | 2           | 1                                       | 2    |
| 915    | EGFR amp  |                  | PTEN, CDKN2A loss                                | 4           | 3                                       | 4    |
| 911    | EGFR gain | MET gain         | NOTCH1 gain, CDKN2A loss                         | 4           | 3                                       | 3    |
| 109B   | EGFR gain |                  | NF1, CDKN2A, PTEN loss                           | 3           | 3                                       | 3    |
| 212B   | EGFR gain |                  | PTEN LOH; CDKN2A and RB1 loss                    | 3           | 4                                       | 3    |
| 114    |           | IDH1             | IDH1 mutant; CMYC, WNT5A, YES1 amp               | 1           | 0                                       | 1    |
| 79     | EGFR gain |                  | CDKN2A loss                                      | 3           | 3                                       | 4    |
| 417    | EGFR gain | MET gain         | TP53, NF1, RB1 loss                              | 3           | 1                                       | 3    |
| 1118   |           | MET amp          | whole chromosome 10 LOH                          | nd          | 3                                       | 4    |
| 126    | EGFR amp  |                  | PTEN, CDKN2A loss, QKI loss                      | 4           | 3                                       | 4    |

**Table S4: Tally of tumor mutations and phenotypes in TMA GBM specimens.**

Each diagnosis of glioblastoma multiforme grade IV was reconfirmed by histopathology. Tissues selected for the TMA were reviewed by a neuropathologist for tumor phenotype and cellularity. 2-4 tissue specimens from 1-2 paraffin blocks for each tumor were selected and core regions were used to create the TMA. Curated tumor genotype from FISH, Oncoscan copy number arrays, and/or RNAseq genomic profiling for all tumor specimens used for IHC data for YAP, TAZ, and EGFR expression. IHC data was scored on a 1-4 scale for signal intensity specific to tumor cells, and, for YAP and TAZ, nuclear localization.



Table S5

| Gene Description                                               | Gene     | log2ratio VP treated/control | p-value |
|----------------------------------------------------------------|----------|------------------------------|---------|
| Malectin                                                       | MLEC     | -6.64                        | 0.0022  |
| Transducin beta-like protein 2                                 | TBL2     | -6.64                        | 0.0249  |
| Isoform 4 of Rabankyrin-5                                      | ANKFY1   | -6.64                        | 0.0088  |
| Isoform 2 of Galactokinase                                     | GALK1    | -6.64                        | 0.0013  |
| Putative peptidyl-tRNA hydrolase PTRHD1                        | PTRHD1   | -6.64                        | 0.0013  |
| Isoform B of Nucleoporin SEH1                                  | SEH1L    | -6.64                        | 0.0171  |
| Deoxyribose-phosphate aldolase                                 | DERA     | -6.64                        | 0.0006  |
| CDGSH iron-sulfur domain-containing protein 1                  | CISD1    | -6.64                        | 0.0092  |
| Isocitrate dehydrogenase [NAD] subunit gamma, mitochondrial    | IDH3G    | -6.64                        | 0.0380  |
| CD97 antigen                                                   | CD97     | -6.64                        | 0.0053  |
| Exocyst complex component 1                                    | EXOC1    | -6.64                        | 0.0075  |
| Peflin                                                         | PEF1     | -6.64                        | 0.0002  |
| Isoform 2 of Peroxisomal acyl-coenzyme A oxidase 1             | ACOX1    | -6.64                        | 0.0023  |
| A-kinase anchor protein 8                                      | AKAP8    | -6.64                        | 0.0013  |
| Metaxin-2                                                      | MTX2     | -6.64                        | 0.0023  |
| DNA primase small subunit                                      | PRIM1    | -6.64                        | 0.0214  |
| Fatty acid desaturase 2                                        | FADS2    | -6.64                        | 0.0178  |
| Rab3 GTPase-activating protein catalytic subunit               | RAB3GAP1 | -6.64                        | 0.0011  |
| Zinc finger CCCH-type antiviral protein 1-like                 | ZC3HAV1L | -6.64                        | 0.0002  |
| Peptidyl-tRNA hydrolase 2, mitochondrial                       | PTRH2    | -6.64                        | 0.0003  |
| Phosphoglycolate phosphatase                                   | PGP      | -6.64                        | 0.0161  |
| Exocyst complex component 7                                    | EXOC7    | -6.64                        | 0.0178  |
| Peroxisomal acyl-coenzyme A oxidase 1                          | ACOX1    | -6.64                        | 0.0065  |
| Isoform 2 of Rab3 GTPase-activating protein catalytic subunit  | RAB3GAP1 | -6.64                        | 0.0020  |
| NHL repeat-containing protein 2                                | NHLRC2   | -6.64                        | 0.0075  |
| Protein sel-1 homolog 1                                        | SEL1L    | -6.64                        | 0.0004  |
| ATP-dependent Clp protease proteolytic subunit, mitochondrial  | CLPP     | -6.64                        | 0.0453  |
| Polypeptide N-acetylgalactosaminyltransferase 2                | GALNT2   | -6.64                        | 0.0460  |
| Isoform 2 of Fatty aldehyde dehydrogenase                      | ALDH3A2  | -6.64                        | 0.0161  |
| Golgi resident protein GCP60                                   | ACBD3    | -6.64                        | 0.0061  |
| Nucleoporin Nup43                                              | NUP43    | -6.64                        | 0.0080  |
| Mitochondrial carrier homolog 2                                | MTCH2    | -6.64                        | 0.0007  |
| Isoform 3 of Signal peptidase complex catalytic subunit SEC11A | SEC11A   | -6.64                        | 0.0075  |
| Phosphatidylinositide phosphatase SAC1                         | SACM1L   | -6.64                        | 0.0123  |
| GTPase HRas                                                    | HRAS     | -6.64                        | 0.0075  |
| 39S ribosomal protein L17, mitochondrial                       | MRPL17   | -6.64                        | 0.0023  |
| Ragulator complex protein LAMTOR3                              | LAMTOR3  | -6.64                        | 0.0003  |
| Protein O-GlcNAcase                                            | MGEA5    | -6.64                        | 0.0013  |
| SPARC                                                          | SPARC    | -6.64                        | 0.0257  |

| Gene Description                                          | Gene    | log2ratio VP treated/control | p-value |
|-----------------------------------------------------------|---------|------------------------------|---------|
| E3 ubiquitin-protein ligase RING1                         | RING1   | -6.64                        | 0.0013  |
| Integrin-linked protein kinase                            | ILK     | -6.64                        | 0.0013  |
| Poly(ADP-ribose) glycohydrolase ARH3                      | ADPRHL2 | -6.64                        | 0.0194  |
| Short coiled-coil protein                                 | SCOC    | -6.64                        | 0.0080  |
| Syntaxin-binding protein 3                                | STXBP3  | -6.64                        | 0.0075  |
| Selenocysteine-specific elongation factor                 | EEFSEC  | -6.64                        | 0.0002  |
| Isoform 4 of E3 ubiquitin-protein ligase TRIM9            | TRIM9   | -6.64                        | 0.0023  |
| Transmembrane protein 41B                                 | TMEM41B | -6.64                        | 0.0399  |
| 3-ketoacyl-CoA thiolase, peroxisomal                      | ACAA1   | -6.64                        | 0.0453  |
| Isoform 5 of Oxysterol-binding protein-related protein 6  | OSBPL6  | -6.64                        | 0.0314  |
| Isoform 2 of Calnexin                                     | CANX    | -5.62                        | 0.0384  |
| Cytochrome c oxidase subunit 2                            | MT      | -5.58                        | 0.0004  |
| Isocitrate dehydrogenase [NAD] subunit, mitochondrial     | IDH3B   | -5.53                        | 0.0341  |
| Sideroflexin-3                                            | SFXN3   | -5.53                        | 0.0299  |
| Dynein light chain 2, cytoplasmic                         | DYNLL2  | -5.53                        | 0.0080  |
| Isoform 5 of AP-3 complex subunit delta-1                 | AP3D1   | -5.48                        | 0.0130  |
| Cleavage and polyadenylation specificity factor subunit 3 | CPSF3   | -5.48                        | 0.0071  |
| Guanine nucleotide-binding protein subunit alpha-11       | GNA11   | -5.43                        | 0.0405  |
| Echinoderm microtubule-associated protein-like 4          | EML4    | -5.40                        | 0.0205  |
| ADP-ribosylation factor-like protein 8A                   | ARL8A   | -5.36                        | 0.0111  |
| 39S ribosomal protein L39, mitochondrial                  | MRPL39  | -5.36                        | 0.0255  |
| Ribose-5-phosphate isomerase                              | RPIA    | -5.36                        | 0.0437  |
| UPF0488 protein C8orf33                                   | C8orf33 | -5.36                        | 0.0114  |
| 7SK snRNA methylphosphate capping enzyme                  | MEPCE   | -5.36                        | 0.0160  |
| Mitochondrial import receptor subunit TOM70               | TOMM70A | -5.34                        | 0.0003  |
| Isoform 2 of Caseinolytic peptidase B protein homolog     | CLPB    | -5.33                        | 0.0257  |
| E3 ubiquitin-protein ligase CHIP                          | STUB1   | -5.33                        | 0.0029  |
| E3 UFM1-protein ligase 1                                  | UFL1    | -5.29                        | 0.0428  |
| DDB1- and CUL4-associated factor 7                        | DCAF7   | -5.29                        | 0.0101  |
| Protein FAM3C                                             | FAM3C   | -5.29                        | 0.0011  |
| Cyclin-dependent kinase 2                                 | CDK2    | -5.29                        | 0.0344  |
| Nucleobindin 2, isoform CRA_b                             | NUCB2   | -5.25                        | 0.0305  |
| RNA-binding protein Musashi homolog 1                     | MSI1    | -5.25                        | 0.0300  |
| Cytochrome c oxidase subunit 4 isoform 1, mitochondrial   | COX4I1  | -5.20                        | 0.0011  |
| 39S ribosomal protein L3, mitochondrial                   | MRPL3   | -5.20                        | 0.0058  |
| Hepatitis B virus x interacting protein                   | LAMTOR5 | -5.20                        | 0.0061  |
| Apolipoprotein O                                          | APOO    | -5.20                        | 0.0111  |
| Ragulator complex protein LAMTOR5                         | LAMTOR5 | -5.20                        | 0.0061  |
| Protein canopy homolog 3                                  | CNPY3   | -5.20                        | 0.0111  |
| NADPH--cytochrome P450 reductase                          | POR     | -5.20                        | 0.0184  |

| Gene Description                                                        | Gene    | log2ratio VP treated/control | p-value |
|-------------------------------------------------------------------------|---------|------------------------------|---------|
| Serine/threonine-protein kinase PRP4 homolog                            | PRPF4B  | -5.20                        | 0.0178  |
| AH receptor-interacting protein                                         | AIP     | -5.20                        | 0.0013  |
| Succinyl-CoA ligase [ADP/GDP-forming] subunit alpha, mitochondrial      | SUCLG1  | -5.17                        | 0.0007  |
| Replication protein A 14 kDa subunit                                    | RPA3    | -5.17                        | 0.0213  |
| Beta-catenin-like protein 1                                             | CTNNBL1 | -5.15                        | 0.0012  |
| 26S proteasome non-ATPase regulatory subunit 7                          | PSMD7   | -5.15                        | 0.0262  |
| Glutamate-rich WD repeat-containing protein 1                           | GRWD1   | -5.15                        | 0.0090  |
| Peptidyl-prolyl cis-trans isomerase H                                   | PPIH    | -5.15                        | 0.0120  |
| Isoform 2 of Mannose-1-phosphate guanyltransferase beta                 | GMPPB   | -5.15                        | 0.0090  |
| Protein LYRIC                                                           | MTDH    | -5.14                        | 0.0466  |
| Nuclear pore complex protein Nup133                                     | NUP133  | -5.14                        | 0.0466  |
| Catenin delta-1                                                         | CTNND1  | -5.14                        | 0.0300  |
| Protein lunapark                                                        | LNP     | -5.13                        | 0.0211  |
| Nuclear pore complex protein Nup160                                     | NUP160  | -5.13                        | 0.0332  |
| Carnitine O-palmitoyltransferase 2, mitochondrial                       | CPT2    | -5.12                        | 0.0215  |
| Isoform 4 of Protein lunapark                                           | LNP     | -5.09                        | 0.0387  |
| Pachytene checkpoint protein 2 homolog                                  | TRIP13  | -5.09                        | 0.0241  |
| Protein LSM14 homolog A                                                 | LSM14A  | -5.09                        | 0.0223  |
| Isoform 2 of Peptidyl-prolyl cis-trans isomerase FKBP8                  | FKBP8   | -5.09                        | 0.0011  |
| Polycomb protein SUZ12                                                  | SUZ12   | -5.09                        | 0.0011  |
| 39S ribosomal protein L47, mitochondrial                                | MRPL47  | -5.09                        | 0.0044  |
| Mitochondrial fission 1 protein                                         | FIS1    | -5.09                        | 0.0132  |
| Acyl-protein thioesterase 2                                             | LYPLA2  | -5.09                        | 0.0005  |
| ADP-ribosylation factor-like protein 8B                                 | ARL8B   | -5.09                        | 0.0051  |
| Succinate dehydrogenase [ubiquinone] iron-sulfur subunit, mitochondrial | SDHB    | -5.09                        | 0.0433  |
| ATP-dependent Clp protease ATP-binding subunit clpX-like, mitochondrial | CLPX    | -5.09                        | 0.0161  |
| pre-rRNA processing protein FTSJ3                                       | FTSJ3   | -5.09                        | 0.0132  |
| Putative GTP cyclohydrolase 1 type 2 NIF3L1                             | NIF3L1  | -5.09                        | 0.0405  |
| Glutathione peroxidase (Fragment)                                       | GPX4    | -5.09                        | 0.0243  |
| Glutathione peroxidase (Fragment)                                       | GPX4    | -5.09                        | 0.0223  |
| Isoform 5 of Ubiquitin carboxyl-terminal hydrolase 19                   | USP19   | -5.09                        | 0.0161  |
| TIP41-like protein                                                      | TIPRL   | -5.07                        | 0.0478  |
| Sideroflexin-1                                                          | SFXN1   | -5.05                        | 0.0042  |
| Eukaryotic translation elongation factor 1 epsilon-1                    | EEF1E1  | -5.05                        | 0.0249  |
| Reticulon-1                                                             | RTN1    | -5.05                        | 0.0420  |
| Mitochondrial Rho GTPase 2                                              | RHOT2   | -5.03                        | 0.0135  |
| Intron-binding protein aquarius                                         | AQR     | -5.03                        | 0.0013  |
| EH domain-containing protein 1                                          | EHD1    | -5.03                        | 0.0135  |
| 28S ribosomal protein S23, mitochondrial                                | MRPS23  | -5.03                        | 0.0437  |
| EH domain-containing protein 1                                          | EHD1    | -5.03                        | 0.0135  |

| Gene Description                                                       | Gene     | log2ratio VP treated/control | p-value |
|------------------------------------------------------------------------|----------|------------------------------|---------|
| Isoform 2 of 3'(2'),5'-bisphosphate nucleotidase 1                     | BPNT1    | -5.03                        | 0.0226  |
| Mitochondrial import inner membrane translocase subunit Tim9           | TIMM9    | -5.03                        | 0.0009  |
| Isoform 3 of Fermitin family homolog 2                                 | FERMT2   | -5.02                        | 0.0065  |
| 3-hydroxyisobutyryl-CoA hydrolase, mitochondrial                       | HIBCH    | -4.99                        | 0.0412  |
| Isoform 4 of Pyruvate dehydrogenase E1 component subunit alpha, somati | PDHA1    | -4.97                        | 0.0174  |
| Vacuolar protein sorting-associated protein 29                         | VPS29    | -4.95                        | 0.0016  |
| Guanine nucleotide-binding protein G(q) subunit alpha                  | GNAQ     | -4.95                        | 0.0033  |
| Tricarboxylate transport protein, mitochondrial                        | SLC25A1  | -4.95                        | 0.0224  |
| Pleiotropic regulator 1                                                | PLRG1    | -4.95                        | 0.0031  |
| GTPase NRas                                                            | NRAS     | -4.95                        | 0.0285  |
| Cation-dependent mannose-6-phosphate receptor                          | M6PR     | -4.95                        | 0.0224  |
| Aldehyde dehydrogenase family 16 member A1                             | ALDH16A1 | -4.95                        | 0.0481  |
| NAD kinase 2, mitochondrial                                            | NADK2    | -4.95                        | 0.0031  |
| 3'(2'),5'-bisphosphate nucleotidase 1                                  | BPNT1    | -4.95                        | 0.0307  |
| E3 ubiquitin-protein ligase BRE1A                                      | RNF20    | -4.95                        | 0.0218  |
| Isoform 3 of Peptidyl-prolyl cis-trans isomerase E                     | PPIE     | -4.95                        | 0.0033  |
| Pyruvate dehydrogenase protein X component, mitochondrial              | PDHX     | -4.95                        | 0.0111  |
| Protein ABHD14A-ACY1                                                   | ABHD14A  | -4.95                        | 0.0031  |
| Syndecan binding protein (Syntenin), isoform CRA_a                     | SDCBP    | -4.95                        | 0.0038  |
| UPF0587 protein C1orf123                                               | C1orf123 | -4.95                        | 0.0132  |
| OS=Homo sapiens GN=NUCB1 PE=1 SV=4                                     | NUCB1    | -4.93                        | 0.0071  |
| Endoplasmic reticulum resident protein 44                              | ERP44    | -4.93                        | 0.0420  |
| NADH dehydrogenase [ubiquinone] flavoprotein 1, mitochondrial          | NDUFV1   | -4.92                        | 0.0043  |
| Protein BUD31 homolog                                                  | BUD31    | -4.90                        | 0.0022  |
| Lamin-B receptor                                                       | LBR      | -4.90                        | 0.0420  |
| NADH dehydrogenase [ubiquinone] 1 alpha subcomplex subunit 10, mitoch  | NDUFA10  | -4.90                        | 0.0405  |
| Importin subunit alpha-4                                               | KPNA3    | -4.90                        | 0.0241  |
| cAMP-dependent protein kinase catalytic subunit alpha                  | PRKACA   | -4.90                        | 0.0307  |
| Ras GTPase-activating-like protein IQGAP2                              | IQGAP2   | -4.90                        | 0.0405  |
| Isoform Mitochondrial of Lysine--tRNA ligase                           | KARS     | -4.87                        | 0.0502  |
| Isoform 2 of 5'-nucleotidase domain-containing protein 2               | NT5DC2   | -4.87                        | 0.0119  |
| Golgi phosphoprotein 3                                                 | GOLPH3   | -4.87                        | 0.0079  |
| Basigin                                                                | BSG      | -4.87                        | 0.0194  |
| Inositol-3-phosphate synthase 1                                        | ISYNA1   | -4.87                        | 0.0224  |
| Pre-mRNA-processing factor 6                                           | PRPF6    | -4.87                        | 0.0079  |
| Alpha-globin transcription factor CP2                                  | TFCP2    | -4.87                        | 0.0194  |
| Enhancer of mRNA-decapping protein 3                                   | EDC3     | -4.87                        | 0.0194  |
| Very-long-chain 3-oxoacyl-CoA reductase                                | HSD17B12 | -4.85                        | 0.0109  |
| Isoform 3 of Malignant T-cell-amplified sequence 1                     | MCTS1    | -4.85                        | 0.0239  |
| Huntingtin-interacting protein K                                       | HYPK     | -4.83                        | 0.0058  |

| Gene Description                                                         | Gene    | log2ratio VP treated/control | p-value |
|--------------------------------------------------------------------------|---------|------------------------------|---------|
| 60S ribosomal protein L36a-like                                          | RPL36AL | -3.95                        | 0.0012  |
| 2',3'-cyclic-nucleotide 3'-phosphodiesterase                             | CNP     | -3.93                        | 0.0211  |
| Syntaxin-12                                                              | STX12   | -3.93                        | 0.0033  |
| Peripheral plasma membrane protein CASK                                  | CASK    | -3.93                        | 0.0003  |
| Dynamamin-1                                                              | DNM1    | -3.92                        | 0.0031  |
| Succinate dehydrogenase [ubiquinone] flavoprotein subunit, mitochondrial | SDHA    | -3.91                        | 0.0334  |
| Nuclear pore complex protein Nup153                                      | NUP153  | -3.90                        | 0.0383  |
| Isoform 3 of Nuclear pore complex protein Nup153                         | NUP153  | -3.90                        | 0.0383  |
| Vacuolar protein sorting-associated protein 4B                           | VPS4B   | -3.89                        | 0.0448  |
| 3-ketoacyl-CoA thiolase, mitochondrial                                   | ACAA2   | -3.85                        | 0.0229  |
| Serine/threonine-protein phosphatase PGAM5, mitochondrial                | PGAM5   | -3.85                        | 0.0132  |
| Pyrroline-5-carboxylate reductase 2                                      | PYCR2   | -3.85                        | 0.0274  |
| Eukaryotic translation initiation factor 2A                              | EIF2A   | -3.83                        | 0.0218  |
| NADH dehydrogenase [ubiquinone] 1 alpha subcomplex subunit 8             | NDUFA8  | -3.82                        | 0.0420  |
| Septin 10, isoform CRA_c                                                 | SEPT10  | -3.81                        | 0.0439  |
| Adenylate kinase 4, mitochondrial                                        | AK4     | -3.80                        | 0.0270  |
| Apoptosis-inducing factor 1, mitochondrial                               | AIFM1   | -3.79                        | 0.0303  |
| Actin-related protein 2/3 complex subunit 1A                             | ARPC1A  | -3.79                        | 0.0323  |
| Lysosome-associated membrane glycoprotein 1                              | LAMP1   | -3.76                        | 0.0094  |
| NADPH:adrenodoxin oxidoreductase, mitochondrial                          | FDXR    | -3.76                        | 0.0026  |
| Isoform 3 of ARF GTPase-activating protein GIT1                          | GIT1    | -3.71                        | 0.0376  |
| Dipeptidyl peptidase 1                                                   | CTSC    | -3.70                        | 0.0499  |
| DNA-directed RNA polymerase II subunit RPB3                              | POLR2C  | -3.68                        | 0.0270  |
| Chimera CSNK2B-LY6G5B splicing isoform 991                               | CSNK2B  | -3.68                        | 0.0394  |
| Cation-independent mannose-6-phosphate receptor                          | IGF2R   | -3.68                        | 0.0940  |
| ATPase ASNA1                                                             | ASNA1   | -3.67                        | 0.0028  |
| H/ACA ribonucleoprotein complex subunit 2                                | NHP2    | -3.65                        | 0.0335  |
| Arfaptin-1                                                               | ARFIP1  | -3.65                        | 0.0502  |
| Isoform 4 of Dynamamin-3                                                 | DNM3    | -3.65                        | 0.0072  |
| Ribonucleoprotein PTB-binding 1                                          | RAVER1  | -3.65                        | 0.0058  |
| Protein NipSnap homolog 2                                                | GBAS    | -3.60                        | 0.0224  |
| Isoform 2 of General vesicular transport factor p115                     | USO1    | -3.60                        | 0.0175  |
| Vesicle-associated membrane protein-associated protein B/C               | VAPB    | -3.60                        | 0.0058  |
| Ras-related protein Rab-21                                               | RAB21   | -3.60                        | 0.0080  |
| 60 kDa SS-A/Ro ribonucleoprotein                                         | TROVE2  | -3.59                        | 0.0367  |
| Epidermal growth factor receptor                                         | EGFR    | -3.59                        | 0.0229  |
| Zinc finger CCCH-type antiviral protein 1                                | ZC3HAV1 | -3.57                        | 0.0184  |
| NADH dehydrogenase [ubiquinone] 1 alpha subcomplex subunit 5             | NDUFA5  | -3.55                        | 0.0114  |
| Isocitrate dehydrogenase [NAD] subunit alpha, mitochondrial              | IDH3A   | -3.51                        | 0.0438  |
| Isoform 4 of Alpha-actinin-1                                             | ACTN1   | -3.50                        | 0.0370  |

| Gene Description                                                                | Gene     | log2ratio VP treated/control | p-value |
|---------------------------------------------------------------------------------|----------|------------------------------|---------|
| Putative coiled-coil-helix-coiled-coil-helix domain-containing protein CHCHD2P9 | CHCHD2P9 | -3.48                        | 0.0147  |
| Procollagen galactosyltransferase 1                                             | COLGALT1 | -3.46                        | 0.0434  |
| Isoform 2 of Isochorismatase domain-containing protein 2, mitochondrial         | ISOC2    | -3.43                        | 0.0325  |
| Adenylate kinase isoenzyme 1                                                    | AK1      | -3.41                        | 0.0463  |
| Isoform 2 of Protein FAM98B                                                     | FAM98B   | -3.41                        | 0.0349  |
| Nuclear inhibitor of protein phosphatase 1                                      | PPP1R8   | -3.41                        | 0.0341  |
| Isoform 2 of Protein ELYS                                                       | AHCTF1   | -3.41                        | 0.0341  |
| N-acetylserotonin O-methyltransferase-like protein                              | ASMTL    | -3.32                        | 0.0213  |
| Septin-6                                                                        | SEPT6    | -3.30                        | 0.0143  |
| Uncharacterized protein C19orf43                                                | C19orf43 | -3.27                        | 0.0161  |
| Pterin-4-alpha-carbinolamine dehydratase                                        | PCBD1    | -3.27                        | 0.0132  |
| Isoform 3 of Bcl-2-like protein 2                                               | BCL2L2   | -3.21                        | 0.0743  |
| Cysteine and glycine-rich protein 1                                             | CSRP1    | -3.18                        | 0.0179  |
| Dolichyl-diphosphooligosaccharide--protein glycosyltransferase subunit 2        | RPN2     | -3.18                        | 0.0308  |
| Signal transducer and activator of transcription 3                              | STAT3    | -3.16                        | 0.0696  |
| Cytochrome c oxidase subunit 5A, mitochondrial                                  | COX5A    | -3.07                        | 0.0161  |
| MICOS complex subunit MIC19                                                     | CHCHD3   | -3.03                        | 0.0434  |
| N(G),N(G)-dimethylarginine dimethylaminohydrolase 1                             | DDAH1    | -3.02                        | 0.0442  |
| Coiled-coil domain-containing protein 124                                       | CCDC124  | -3.01                        | 0.0028  |
| Cytochrome b-c1 complex subunit 1, mitochondrial                                | UQCRC1   | -2.96                        | 0.0352  |
| Isoform 2 of LIM and SH3 domain protein 1                                       | LASP1    | -2.89                        | 0.0375  |
| C-1-tetrahydrofolate synthase, cytoplasmic                                      | MTHFD1   | -2.88                        | 0.0506  |
| Fumarate hydratase, mitochondrial                                               | FH       | -2.84                        | 0.0003  |
| 14-3-3 protein zeta/delta                                                       | YWHAZ    | -2.70                        | 0.0069  |
| Alpha-actinin-4                                                                 | ACTN4    | -2.67                        | 0.0438  |
| Phosphatidylethanolamine-binding protein 1                                      | PEBP1    | -2.58                        | 0.0042  |
| Isoform B of Ras-related C3 botulinum toxin substrate 1                         | RAC1     | -2.47                        | 0.0018  |
| Fascin                                                                          | FSCN1    | -2.46                        | 0.0336  |
| LIM domain and actin-binding protein 1                                          | LIMA1    | -2.44                        | 0.0347  |
| Ras-related protein Rab-1A                                                      | RAB1A    | -2.42                        | 0.0212  |
| Mitotic checkpoint protein BUB3                                                 | BUB3     | -2.40                        | 0.0161  |
| RNA-binding protein 4                                                           | RBM4     | -2.39                        | 0.0508  |
| Isoform 4 of LIM domain and actin-binding protein 1                             | LIMA1    | -2.37                        | 0.0369  |
| 60S ribosomal protein L36a                                                      | RPL36A   | -2.37                        | 0.0095  |
| 60S ribosomal protein L23                                                       | RPL23    | -2.33                        | 0.0178  |
| 60S ribosomal protein L15                                                       | RPL15    | -2.17                        | 0.0314  |
| Isocitrate dehydrogenase [NADP] cytoplasmic                                     | IDH1     | -2.04                        | 0.0125  |
| Low molecular weight phosphotyrosine protein phosphatase                        | ACP1     | -2.01                        | 0.0502  |
| Isoform 4 of Elongation factor 1-delta                                          | EEF1D    | -2.00                        | 0.0390  |

**Table S5: Proteomic Analysis of VP treated GBM Gliomaspheres.** GBM301, GBM2 (EGFRvIII), and GBM1219 (EGFR wild-type) GSCs were treated with verteporfin (VP) for 6 hours and were subjected to label-free total proteomic profiling according to published protocols (1, 2). The table shows proteins that decreased an average 2-fold or more in protein levels in VP treated GSCs compared to control GSCs in the three GSC cell cultures profiled. The log<sub>2</sub>ratio values shown are averages for all three cell cultures profiled. The p-values shown represent multiple t tests for peptide-to-spectrum (PSM) matches for each protein in all three VP-treated GSCs compared to control GSCs. Proteins that showed different levels between control and VP treated samples with a p-value of .05 or less are listed in the table. Additional proteins with p-values greater than .05 for which we have documented protein level reductions by western blot (STAT3, IGF2R, BCL2L2) are also listed. Proteins with low abundance (1-2 PSMs) in control samples were excluded from analysis. Core signaling proteins are highlighted in yellow and and core metabolic and mitochondrial proteins uncovered by bioinformatic pathway analysis (see Table S5) are highlighted in blue. A total of different 5482 proteins were identified in our profiles.

1. Seyfried, N. T., E. B. Dammer, V. Swarup, D. Nandakumar, D. M. Duong, L. Yin, Q. Deng, T. Nguyen, C. M. Hales, T. Wingo, J. Glass, M. Gearing, M. Thambisetty, J. C. Troncoso, D. H. Geschwind, J. J. Lah and A. I. Levey (2017). "A Multi-network Approach Identifies Protein-Specific Co-expression in Asymptomatic and Symptomatic Alzheimer's Disease." *Cell Systems* 4(1): 60-72.e64.
2. Wingo, T. S., D. M. Duong, M. Zhou, E. B. Dammer, H. Wu, D. J. Cutler, J. J. Lah, A. I. Levey and N. T. Seyfried (2017). "Integrating Next-Generation Genomic Sequencing and Mass Spectrometry to Estimate Allele-Specific Protein Abundance in Human Brain." *Journal of Proteome Research* 16(9): 3336-3347.

| Pathway ID | Pathway Name                                                    | Source                                                   | p-Value  | FDR B&H  | FDR B&Y  | Bonferroni | Genes from Input   | Genes in Annotation  |
|------------|-----------------------------------------------------------------|----------------------------------------------------------|----------|----------|----------|------------|--------------------|----------------------|
| 1270125    | Citric acid cycle (TCA cycle)                                   | <a href="#">BioSystems: REACTOME</a>                     | 5.35E-10 | 3.49E-07 | 2.78E-06 | 8.51E-07   | <a href="#">8</a>  | <a href="#">19</a>   |
| 1270122    | Pyruvate metabolism and Citric Acid (TCA) cycle                 | <a href="#">BioSystems: REACTOME</a>                     | 6.60E-10 | 3.49E-07 | 2.78E-06 | 1.05E-06   | <a href="#">11</a> | <a href="#">49</a>   |
| 1270121    | The citric acid (TCA) cycle and respiratory electron transport  | <a href="#">BioSystems: REACTOME</a>                     | 1.25E-09 | 3.92E-07 | 3.11E-06 | 1.99E-06   | <a href="#">18</a> | <a href="#">171</a>  |
| 82927      | Citrate cycle (TCA cycle)                                       | <a href="#">BioSystems: KEGG</a>                         | 1.48E-09 | 3.92E-07 | 3.11E-06 | 2.35E-06   | <a href="#">9</a>  | <a href="#">30</a>   |
| 132956     | Metabolic pathways                                              | <a href="#">BioSystems: KEGG</a>                         | 1.02E-07 | 1.82E-05 | 1.45E-04 | 1.62E-04   | <a href="#">49</a> | <a href="#">1272</a> |
| 814926     | Carbon metabolism                                               | <a href="#">BioSystems: KEGG</a>                         | 1.03E-07 | 1.82E-05 | 1.45E-04 | 1.64E-04   | <a href="#">13</a> | <a href="#">114</a>  |
| 1269688    | Processing of Capped Intron-Containing Pre-mRNA                 | <a href="#">BioSystems: REACTOME</a>                     | 4.08E-07 | 4.99E-05 | 3.96E-04 | 6.48E-04   | <a href="#">18</a> | <a href="#">248</a>  |
| 413347     | Citrate cycle, first carbon oxidation, oxaloacetate             | <a href="#">BioSystems: KEGG</a>                         | 6.28E-06 | 5.55E-04 | 4.41E-03 | 9.98E-03   | <a href="#">4</a>  | <a href="#">8</a>    |
| 1269695    | Transport of Mature mRNAs Derived from Intronless Transcripts   | <a href="#">BioSystems: REACTOME</a>                     | 1.25E-05 | 9.06E-04 | 7.20E-03 | 1.99E-02   | <a href="#">7</a>  | <a href="#">45</a>   |
| 1269114    | Transport of Ribonucleoproteins into the Host Nucleus           | <a href="#">BioSystems: REACTOME</a>                     | 1.45E-05 | 9.20E-04 | 7.31E-03 | 2.30E-02   | <a href="#">6</a>  | <a href="#">31</a>   |
| 1269922    | Regulation of Glucokinase by Glucokinase Regulatory Protein     | <a href="#">BioSystems: REACTOME</a>                     | 1.45E-05 | 9.20E-04 | 7.31E-03 | 2.30E-02   | <a href="#">6</a>  | <a href="#">31</a>   |
| 1339112    | SUMOylation of RNA binding proteins                             | <a href="#">BioSystems: REACTOME</a>                     | 1.95E-05 | 1.10E-03 | 8.77E-03 | 3.09E-02   | <a href="#">7</a>  | <a href="#">48</a>   |
| 868084     | Fatty acid metabolism                                           | <a href="#">BioSystems: KEGG</a>                         | 1.95E-05 | 1.10E-03 | 8.77E-03 | 3.09E-02   | <a href="#">7</a>  | <a href="#">48</a>   |
| 1269697    | Transport of the SLBP independent Mature mRNA                   | <a href="#">BioSystems: REACTOME</a>                     | 2.53E-05 | 1.26E-03 | 9.98E-03 | 4.02E-02   | <a href="#">6</a>  | <a href="#">34</a>   |
| 1269085    | Rev-mediated nuclear export of HIV RNA                          | <a href="#">BioSystems: REACTOME</a>                     | 2.53E-05 | 1.26E-03 | 9.98E-03 | 4.02E-02   | <a href="#">6</a>  | <a href="#">34</a>   |
| 1269817    | Nuclear Pore Complex (NPC) Disassembly                          | <a href="#">BioSystems: REACTOME</a>                     | 3.01E-05 | 1.41E-03 | 1.12E-02 | 4.78E-02   | <a href="#">6</a>  | <a href="#">35</a>   |
| 1269696    | Transport of the SLBP Dependant Mature mRNA                     | <a href="#">BioSystems: REACTOME</a>                     | 3.01E-05 | 1.41E-03 | 1.12E-02 | 4.78E-02   | <a href="#">6</a>  | <a href="#">35</a>   |
| 1269877    | Membrane Trafficking                                            | <a href="#">BioSystems: REACTOME</a>                     | 3.15E-05 | 1.43E-03 | 1.14E-02 | 5.00E-02   | <a href="#">26</a> | <a href="#">614</a>  |
| 83070      | Adherens junction                                               | <a href="#">BioSystems: KEGG</a>                         | 3.79E-05 | 1.59E-03 | 1.26E-02 | 6.02E-02   | <a href="#">8</a>  | <a href="#">72</a>   |
| 1269876    | Vesicle-mediated transport                                      | <a href="#">BioSystems: REACTOME</a>                     | 4.01E-05 | 1.63E-03 | 1.30E-02 | 6.36E-02   | <a href="#">27</a> | <a href="#">660</a>  |
| 137918     | Stabilization and expansion of the E-cadherin adherens junction | <a href="#">BioSystems: Pathway Interaction Database</a> | 6.61E-05 | 2.50E-03 | 1.99E-02 | 1.05E-01   | <a href="#">6</a>  | <a href="#">40</a>   |
| 413348     | Citrate cycle, second carbon oxidation, 2-oxoglutarate          | <a href="#">BioSystems: KEGG</a>                         | 8.26E-05 | 2.95E-03 | 2.34E-02 | 1.31E-01   | <a href="#">4</a>  | <a href="#">14</a>   |
| 1270128    | Respiratory electron transport                                  | <a href="#">BioSystems: REACTOME</a>                     | 8.49E-05 | 2.95E-03 | 2.34E-02 | 1.35E-01   | <a href="#">9</a>  | <a href="#">103</a>  |

**Table S6. Pathway analysis of proteins downregulated in GBM cells by short-term VP treatment.** Proteins that showed a 2-fold or more reduction upon 8 hours of VP treatment were identified by proteomic profiling of whole gliomaspheres (see Supplemental Table 3). The pathways over-represented among these proteins were identified using ToppGene (<https://toppgene.cchmc.org/enrichment.jsp>). Constituent proteins for each named pathway are provided in the links in the 'Proteins from Input' column.
